# Supplementary material for: Zero-inflated models for the evaluation of colorectal polyps in colon cancer screening studies—a value-based biostatistics practice
Source: PeerJ. 2025 May 26;13:e19504. doi: 10.7717/peerj.19504 (PMC12121622; doi:10.7717/peerj.19504)
Supplement: Supplemental Information 3 [file peerj-13-19504-s003.xlsx]

## Sheet: Datset1
nid	number_of_polyp_detected_1	study_arm_c	total_procedure_time	age	sex_c
1	0	CAP	1210	60	2
2	0	None	1573	65	2
3	0	None	1148	75	2
4	2	CAP	2955	65	2
5	0	None	1506	67	2
6	0	None	999	75	2
7	0	None	1017	59	1
8	0	None	1240	58	2
9	0	CAP	1172	52	2
10	0	CAP	1252	60	2
11	0	CAP	1320	62	1
12	0	None	953	60	2
13	0	CAP	890	77	2
14	5	None	1978	62	2
15	2	CAP	1857	50	1
16	2	None	1135	55	2
17	2	None	2762	57	2
18	2	CAP	2376	52	1
19	0	None	1440	76	1
20	0	None	1043	64	1
21	0	CAP	943	56	2
22	0	None	745	69	2
23	0	CAP	2002	62	1
24	0	None	830	68	2
25	0	None	930	56	2
26	0	CAP	840	51	2
27	0	None	2101	57	2
28	0	None	1100	59	1
29	0	None	830	62	2
30	0	None	1157	50	2
31	0	None	1158	60	2
32	0	None	1000	80	2
33	0	None	948	50	2
34	0	CAP	950	58	2
35	0	CAP	1050	61	2
36	0	CAP	1570	61	2
37	0	None	1140	56	2
38	0	CAP	659	60	2
39	0	None	1285	66	1
40	0	CAP	852	55	2
41	0	None	811	56	2
42	0	CAP	1873	56	2
43	0	None	1300	62	2
44	0	CAP	0	61	2
45	1	CAP	1608	56	2
46	1	None	1301	55	2
47	1	None	3355	60	2
48	1	None	1670	72	2
49	1	None	1602	69	1
50	1	None	1723	54	2
51	1	CAP	989	53	2
52	1	None	1090	55	2
53	1	None	1639	64	2
54	1	None	1160	80	1
55	1	None	1202	60	2
56	2	None	3791	68	2
57	2	None	1565	61	2
58	3	CAP	758	52	1
59	6	CAP	3689	71	1
60	0	CAP	571	65	2
61	0	CAP	554	62	1
62	1	CAP	630	51	1
63	0	CAP	527	59	2
64	1	None	1420	58	2
65	2	None	693	56	1
66	0	CAP	650	59	1
67	0	None	802	64	2
68	1	CAP	818	55	1
69	1	CAP	842	57	1
70	1	None	760	62	1
71	0	CAP	660	55	2
72	0	None	540	70	1
73	0	None	850	57	2
74	2	CAP	1555	52	2
75	0	None	550	64	2
76	2	None	690	69	2
77	2	None	776	60	1
78	0	CAP	534	76	1
79	1	None	660	57	1
80	0	CAP	655	61	2
81	1	None	672	55	2
82	1	None	682	55	2
83	4	CAP	959	72	2
84	0	None	605	57	1
85	0	CAP	730	51	2
86	0	CAP	1007	55	2
87	0	None	550	64	1
88	0	None	604	69	2
89	3	CAP	806	71	1
90	1	CAP	960	46	2
91	1	None	1221	54	2
92	3	CAP	1023	64	1
93	0	None	625	73	1
94	4	CAP	1151	65	1
95	1	CAP	1303	66	1
96	1	None	898	66	1
97	0	None	726	68	1
98	1	None	730	74	2
99	3	None	910	55	2
100	2	CAP	876	63	2
101	0	None	595	63	1
102	0	CAP	650	61	2
103	1	None	848	54	1
104	0	CAP	611	60	2
105	0	CAP	647	65	2
106	0	None	618	54	2
107	0	None	765	62	2
108	0	None	662	66	2
109	0	CAP	800	59	1
110	0	None	650	53	2
111	3	None	1106	70	1
112	2	CAP	844	61	2
113	0	CAP	731	54	2
114	1	None	710	59	2
115	1	None	735	79	2
116	0	None	1454	52	2
117	0	CAP	872	56	2
118	0	CAP	691	51	2
119	0	None	840	60	1
120	1	CAP	1115	62	1
121	0	CAP	700	52	1
122	0	None	660	51	2
123	2	None	1103	55	1
124	0	None	710	51	2
125	0	CAP	655	65	2
126	0	CAP	675	50	2
127	0	None	913	62	1
128	0	None	636	58	2
129	0	CAP	660	52	1
130	0	None	695	55	2
131	1	None	840	61	1
132	1	CAP	970	61	1
133	4	CAP	1542	55	1
134	1	None	843	71	2
135	1	CAP	716	53	2
136	0	CAP	725	52	2
137	0	None	680	53	2
138	2	CAP	750	60	2
139	1	CAP	764	65	1
140	1	CAP	736	56	2
141	2	None	870	54	2
142	1	CAP	731	59	2
143	1	None	770	71	2
144	0	CAP	702	52	2
145	1	None	919	76	2
146	1	None	836	64	2
147	0	None	685	67	2
148	1	None	958	60	2
149	0	CAP	653	50	2
150	0	CAP	1040	57	2
151	0	CAP	1040	57	2
152	1	CAP	715	50	1
153	1	CAP	1284	64	1
154	1	None	885	52	2
155	3	CAP	854	52	2
156	1	CAP	1006	60	2
157	0	None	810	78	1
158	0	None	735	51	2
159	0	None	740	57	2
160	1	CAP	1000	63	2
161	2	CAP	1040	69	2
162	2	CAP	866	62	1
163	2	None	1117	63	1
164	0	CAP	732	57	1
165	1	CAP	881	63	2
166	4	None	1230	62	1
167	0	CAP	760	57	2
168	1	CAP	1140	55	2
169	1	CAP	747	76	1
170	3	CAP	1267	60	2
171	2	CAP	1002	62	1
172	0	None	673	60	1
173	0	None	795	75	2
174	0	CAP	720	64	1
175	0	CAP	757	64	1
176	1	None	805	71	2
177	5	CAP	1800	67	2
178	1	CAP	1515	59	2
179	1	CAP	910	69	2
180	3	CAP	1497	51	1
181	0	CAP	774	62	1
182	0	CAP	774	62	1
183	6	CAP	2333	56	1
184	0	None	773	57	2
185	0	None	714	65	2
186	3	CAP	1039	64	2
187	4	CAP	1490	57	1
188	4	CAP	1390	76	2
189	0	None	778	65	2
190	3	None	906	62	1
191	0	CAP	774	57	2
192	0	None	780	62	2
193	1	CAP	940	70	2
194	1	CAP	921	77	1
195	2	CAP	863	65	2
196	0	None	850	52	2
197	1	None	1397	52	2
198	0	CAP	810	54	2
199	2	CAP	954	83	1
200	0	None	746	57	2
201	0	CAP	851	73	2
202	0	None	850	55	2
203	0	None	832	54	2
204	1	None	1498	68	2
205	0	CAP	794	51	2
206	0	CAP	837	59	2
207	5	CAP	1620	62	2
208	3	CAP	1200	62	1
209	0	CAP	784	55	1
210	0	CAP	705	66	2
211	1	None	889	60	2
212	0	CAP	692	54	2
213	1	CAP	1104	65	1
214	0	None	805	63	2
215	0	None	965	50	1
216	0	CAP	812	52	2
217	0	None	840	60	2
218	4	None	1384	52	1
219	2	None	896	66	1
220	0	None	867	59	1
221	0	None	880	62	2
222	2	None	2112	57	1
223	0	CAP	924	59	2
224	0	None	753	58	2
225	0	None	837	56	1
226	0	CAP	840	58	2
227	1	CAP	867	67	2
228	1	None	1754	65	1
229	0	None	801	63	2
230	0	CAP	793	47	1
231	0	None	820	76	1
232	1	None	940	55	1
233	1	None	1038	57	1
234	0	CAP	1095	50	2
235	0	CAP	969	63	2
236	0	CAP	939	66	2
237	2	None	1082	55	2
238	0	None	783	67	2
239	1	None	1600	60	1
240	0	None	960	65	2
241	0	None	1021	51	2
242	0	None	820	56	2
243	0	None	802	65	2
244	0	CAP	855	54	2
245	0	CAP	913	50	2
246	0	CAP	840	58	2
247	4	CAP	1478	64	2
248	0	CAP	815	56	2
249	0	None	906	50	2
250	0	CAP	965	53	2
251	1	None	1704	52	1
252	1	CAP	1140	69	1
253	1	CAP	1028	51	2
254	1	None	1099	62	1
255	0	CAP	877	67	1
256	0	CAP	870	59	2
257	0	CAP	880	59	1
258	2	CAP	978	54	1
259	1	None	1238	53	2
260	3	CAP	2471	64	1
261	4	CAP	2452	68	2
262	1	CAP	1429	74	2
263	3	None	1835	59	2
264	0	CAP	1120	57	1
265	2	None	928	62	1
266	1	CAP	2167	50	2
267	0	None	906	62	2
268	2	CAP	957	62	2
269	2	CAP	957	62	2
270	1	None	1040	55	2
271	0	None	845	50	2
272	0	None	860	50	2
273	0	CAP	946	54	2
274	0	CAP	1108	50	1
275	0	CAP	1022	56	2
276	2	CAP	1154	57	2
277	0	CAP	995	50	1
278	3	None	1702	51	1
279	0	None	1625	63	2
280	0	CAP	854	67	2
281	0	CAP	953	52	2
282	0	CAP	878	56	2
283	0	CAP	1027	57	2
284	0	CAP	964	75	2
285	0	CAP	904	60	2
286	0	None	927	53	2
287	0	None	936	52	2
288	0	CAP	1935	52	1
289	0	None	1005	68	1
290	1	None	1615	56	2
291	0	None	981	53	1
292	0	None	577	50	1
293	0	None	837	62	2
294	1	CAP	1381	53	1
295	0	CAP	1445	62	2
296	4	None	1746	57	1
297	0	None	1139	57	2
298	0	None	871	65	2
299	5	CAP	2222	61	2
300	0	CAP	1000	51	2
301	1	None	1300	59	2
302	1	None	1498	59	2
303	3	None	1140	57	2
304	1	CAP	1593	57	2
305	0	CAP	1359	54	2
306	0	None	1470	50	1
307	1	CAP	1276	55	2
308	0	CAP	1139	53	1
309	0	CAP	979	56	2
310	0	CAP	935	52	1
311	1	None	1235	56	2
312	1	None	1010	55	2
313	1	None	1010	55	2
314	1	None	2174	57	1
315	3	CAP	1280	65	1
316	0	CAP	1028	62	2
317	1	None	1439	57	2
318	5	None	1505	60	1
319	0	None	1050	52	2
320	0	CAP	2176	52	1
321	0	CAP	1096	52	1
322	1	None	1023	71	2
323	2	CAP	2078	57	2
324	5	CAP	2730	63	1
325	0	CAP	1029	57	2
326	0	None	1024	54	2
327	0	None	1027	50	2
328	0	CAP	1208	59	1
329	2	CAP	758	80	2
330	1	None	1306	57	2
331	0	CAP	1107	63	1
332	1	None	1126	72	2
333	0	None	1090	64	2
334	0	None	1195	54	2
335	4	CAP	2701	58	2
336	0	CAP	1237	59	2
337	0	CAP	1125	72	2
338	1	CAP	1165	55	2
339	2	None	1823	58	2
340	0	None	1151	61	2
341	0	CAP	1624	60	2
342	6	None	3204	56	1
343	0	CAP	1034	59	2
344	0	None	1023	48	2
345	0	CAP	1426	71	2
346	0	None	1058	72	2
347	0	CAP	1202	54	2
348	0	CAP	2052	60	2
349	0	None	985	70	1
350	0	None	1021	57	2
351	0	None	1618	75	2
352	2	None	3043	57	2
353	1	CAP	1781	62	2
354	0	None	1006	67	1
355	0	None	1070	51	1
356	1	None	1416	63	2
357	3	None	2157	70	2
358	0	CAP	1067	62	1
359	0	None	1047	50	2
360	0	CAP	1327	35	2
361	1	CAP	1047	58	1
362	0	None	1092	56	2
363	2	CAP	1730	60	1
364	0	CAP	1130	73	1
365	0	None	1117	51	2
366	2	None	1647	63	2
367	4	CAP	1789	64	2
368	0	CAP	1390	51	2
369	0	None	1133	54	2
370	0	None	1140	52	2
371	0	CAP	1084	53	2
372	0	CAP	1229	61	2
373	0	None	1170	59	2
374	0	CAP	1133	53	2
375	0	CAP	1187	65	2
376	0	None	1100	70	2
377	3	None	1801	56	2
378	0	CAP	1600	68	2
379	0	CAP	1001	62	2
380	0	None	1213	76	2
381	1	CAP	1346	58	1
382	1	None	1296	50	2
383	1	CAP	1464	59	2
384	0	CAP	1193	67	2
385	0	None	1158	50	2
386	1	None	1717	51	2
387	0	None	1417	57	2
388	0	None	1187	50	2
389	0	None	1245	56	2
390	0	CAP	1188	54	2
391	0	CAP	1427	69	1
392	0	CAP	1215	68	2
393	0	CAP	1250	54	2
394	0	None	1176	60	2
395	3	None	1876	75	2
396	6	CAP	4340	59	1
397	0	None	1358	55	2
398	0	CAP	1173	64	1
399	0	CAP	1329	71	1
400	0	None	1125	54	2
401	3	CAP	2386	56	1
402	2	None	1351	68	2
403	4	CAP	1907	58	1
404	0	None	1664	52	2
405	6	CAP	3856	60	2
406	0	CAP	1342	52	2
407	0	CAP	1585	51	2
408	0	None	1339	54	1
409	6	None	3242	54	1
410	0	None	1627	66	2
411	3	None	3600	65	2
412	0	None	1522	59	2
413	0	None	1473	65	2
414	6	None	3548	61	1
415	2	CAP	3008	52	2
416	0	CAP	1467	60	2
417	1	None	2316	57	2
418	1	None	1562	50	2
419	2	None	1592	53	1
420	0	CAP	1797	64	2
421	0	CAP	2097	67	2
422	0	None	2610	55	2
423	0	None	2512	64	2
424	0	CAP	1839	51	2
425	0	CAP	1158	50	2

## Sheet: Dataset2
nid	Age	Total_procedure_time	segmental	Number_of_polyps_detected_1	Sex_c
1	70	33	Standard	2	Male
2	57	23	Standard	0	Female
3	67	26	Standard	0	Male
4	72	49	Standard	3	Male
5	59	22	Standard	0	Female
6	61	19	Standard	1	Female
7	61	13	Standard	0	Female
8	50	27	Standard	0	Female
9	55	22	Standard	0	Female
10	60	19	Standard	0	Female
11	53	27	Standard	0	Female
12	70	33	Standard	0	Male
13	66	24	Standard	0	Female
14	61	43	Standard	4	Male
15	75	22	Standard	0	Female
16	65	35	Standard	4	Male
17	56	19	Standard	0	Female
18	76		Standard	1	Female
19	55	31	Standard	1	Male
20	72	46	Standard	5	Female
21	60	29	Standard	3	Male
22	69	35	Standard	2	Male
23	51	33	Standard	2	Male
24	51	18	Standard	0	Male
25	63	20	Standard	0	Female
26	52	24	Standard	0	Female
27	67	40	Standard	2	Male
28	53	32	Standard	0	Female
29	70	21	Standard	3	Male
30	64	19	Standard	0	Female
31	63	20	Standard	0	Female
32	52	24	Standard	2	Female
33	56	18	Standard	0	Male
34	61	38	Standard	2	Female
35	53	19	Standard	1	Male
36	59	15	Standard	0	Female
37	51	38	Standard	1	Male
38	55	25	Standard	0	Female
39	56	17	Standard	0	Female
40	73	53	Standard	4	Male
41	54	23	Standard	0	Female
42	60	18	Standard	0	Male
43	56	32	Standard	0	Male
44	65	25	Standard	3	Male
45	46	16	Standard	0	Male
46	46	16	Standard	0	Male
47	61	34	Standard	1	Female
48	50		Standard	0	Female
49	52	28	Standard	0	Female
50	63	18	Standard	0	Female
51	62	18	Standard	0	Female
52	53	17	Standard	0	Female
53	64	25	Standard	1	Female
54	58	38	Standard	5	Female
55	50	27	Standard	2	Male
56	59	21	Standard	0	Female
57	58	27	Standard	1	Female
58	52	34	Standard	2	Male
59	62	20	Standard	0	Female
60	47	16	Standard	0	Female
61	53	23	Standard	1	Female
62	54	45	Standard	0	Female
63	55	30	Standard	2	Female
64	56	28	Standard	0	Female
65	64	20	Standard	0	Female
66	52	28	Standard	2	Female
67	55	26	Standard	0	Female
68	59	33	Standard	0	Female
69	53	19	Standard	1	Female
70	50	18	Standard	0	Female
71	65	29	Standard	1	Female
72	57	24	Standard	1	Male
73	61	13	Standard	0	Female
74	52	33	Standard	2	Female
75	68	19	Standard	0	Male
76	53	25	Standard	1	Male
77	32	29	Standard	5	Female
78	62	32	Standard	1	Female
79	54	31	Standard	0	Female
80	57	47	Standard	0	Female
81	67	23	Standard	0	Male
82	59	17	Standard	0	Male
83	43	48	Standard	2	Female
84	39	34	Standard	1	Male
85	58	24	Standard	4	Female
86	54	18	Standard	0	Female
87	55	26	Standard	0	Female
88	50	22	Standard	0	Female
89	64	30	Standard	2	Male
90	66	32	Standard	2	Male
91	53	23	Standard	1	Female
92	59	31	Standard	2	Female
93	54	32	Standard	0	Female
94	55	25	Standard	3	Female
95	51	39	Segmental	3	Female
96	57	26	Segmental	2	Female
97	68	17	Segmental	0	Female
98	51	19	Segmental	1	Female
99	71	33	Segmental	0	Male
100	75	18	Segmental	0	Male
101	58	74	Segmental	1	Female
102	56	43	Segmental	2	Male
103	63	31	Segmental	2	Male
104	57	36	Segmental	0	Female
105	56	50	Segmental	2	Female
106	63	17	Segmental	0	Female
107	59	35	Segmental	0	Male
108	57	31	Segmental	0	Female
109	60	30	Segmental	0	Male
110	71	23	Segmental	1	Female
111	52	10	Segmental	0	Female
112	67	11	Segmental	1	Male
113	56	22	Segmental	5	Male
114	62	13	Segmental	2	Male
115	66	13	Segmental	1	Male
116	50	15	Segmental	1	Female
117	65	12	Segmental	1	Female
118	51	12	Segmental	0	Female
119	51	21	Segmental	0	Male
120	52	49	Segmental	4	Female
121	53	36	Segmental	2	Male
122	68	18	Segmental	0	Female
123	53	35	Segmental	4	Female
124	65	14	Segmental	0	Male
125	70	28	Segmental	3	Male
126	72	19	Segmental	1	Female
127	70	20	Segmental	2	Male
128	57	11	Segmental	0	Male
129	59	14	Segmental	0	Female
130	51	13	Segmental	0	Female
131	63	38	Segmental	3	Male
132	51	24	Segmental	0	Female
133	59	16	Segmental	0	Male
134	54	21	Segmental	0	Female
135	70	33	Standard	0	Male
136	50	26	Standard	1	Female
137	55	22	Standard	0	Female
138	56	22	Standard	1	Female
139	57	38	Standard	4	Male
140	64	28	Standard	0	Female
141	60	17	Standard	0	Male
142	64	30	Standard	1	Female
143	59	24	Standard	1	Male
144	49	19	Standard	2	Male
145	55	27	Standard	2	Female
146	51	19	Standard	0	Female
147	59	19	Standard	0	Female
148	52	26	Standard	0	Female
149	57	61	Standard	6	Male
150	57	26	Standard	1	Female
151	73	21	Standard	1	Female
152	64	26	Standard	1	Female
153	65	16	Standard	0	Female
154	59	32	Standard	5	Male
155	55	18	Standard	1	Female
156	62	22	Standard	0	Male
157	55	24	Standard	3	Male
158	57	17	Standard	3	Male
159	58	19	Segmental	1	Female
160	61	27	Segmental	3	Male
161	60	22	Segmental	1	Female
162	51	33	Segmental	3	Male
163	59	41	Segmental	0	Female
164	53	23	Segmental	1	Female
165	56	43	Segmental	0	Male
166	50	16	Segmental	0	Female
167	51	24	Segmental	0	Female
168	64	18	Segmental	1	Female
169	57	14	Segmental	0	Female
170	55	17	Segmental	2	Female
171	53	11	Segmental	0	Female
172	60	18	Segmental	3	Male
173	58	83	Segmental	6	Male
174	61	24	Segmental	0	Male
175	51	24	Standard	0	Female
176	53	21	Standard	0	Female
177	61	24	Standard	1	Male
178	50	22	Standard	0	Male
179	55	28	Standard	2	Female
180	62	23	Standard	0	Female
181	58	27	Standard	0	Female
182	58	27	Standard	0	Female
183	59	18	Standard	0	Female
184	59	26	Standard	3	Male
185	65	25	Standard	0	Female
186	56	21	Segmental	0	Male
187	51	42	Segmental	1	Male
188	45	27	Segmental	2	Male
189	58	24	Segmental	0	Female
190	54	22	Segmental	2	Female
191	49	22	Segmental	0	Female
192	62	11	Segmental	0	Female
193	61	66	Segmental	6	Female
194	57	15	Segmental	0	Female
195	52	15	Segmental	0	Male
196	68	15	Segmental	2	Female
197	59	11	Segmental	0	Female
198	65	13	Segmental	1	Male
199	55	10	Segmental	1	Male
200	60	11	Segmental	0	Female
201	56	39	Segmental	1	Female
202	56	29	Segmental	1	Female
203	51	19	Segmental	0	Female
204	66	23	Segmental	1	Female
205	56	11	Segmental	1	Male
206	54	25	Segmental	0	Female
207	56	15	Segmental	1	Female
208	61	18	Segmental	0	Female
209	57	13	Segmental	1	Female
210	36	30	Segmental	6	Female
211	67	18	Segmental	2	Female
212	58	16	Segmental	0	Male
213	61	31	Segmental	4	Female
214	59	32	Segmental	1	Male
215	53	25	Segmental	3	Male
216	59	24	Segmental	1	Male
217	57	37	Segmental	0	Female
218	53	22	Segmental	0	Male
219	62	65	Segmental	3	Female
220	64	31	Segmental	0	Female
221	59	16	Segmental	0	Female
222	56	20	Segmental	0	Female
223	51	20	Segmental	0	Female
224	54	16	Segmental	0	Female
225	58	21	Segmental	0	Male
226	52	47	Segmental	1	Female
227	69	34	Segmental	1	Female
228	53	40	Segmental	0	Female
229	59	9	Segmental	0	Female
230	73	18	Segmental	2	Female
231	50	15	Segmental	0	Female
232	50	16	Segmental	1	Female
233	57	30	Segmental	1	Female
234	66	32	Segmental	0	Female
235	54	16	Segmental	0	Male
236	54	22	Segmental	0	Female
237	58	40	Segmental	0	Female
238	52	26	Segmental	1	Female
239	55	24	Segmental	1	Female
240	53	20	Segmental	1	Male
241	55	54	Segmental	1	Female
242	55	24	Segmental	1	Male
243	67	22	Standard	0	Male
244	59	24	Standard	1	Female
245	61	43	Standard	1	Female
246	50	15	Standard	0	Male
247	60	36	Standard	0	Female
248	58	46	Standard	0	Female
249	54	24	Standard	1	Female
250	51	28	Standard	3	Female
251	57	18	Standard	0	Male
252	62	17	Standard	0	Female
253	64	46	Standard	3	Male
254	64	24	Standard	1	Male
255	53	30	Standard	4	Female
256	58	22	Standard	1	Male
257	64	18	Standard	0	Female
258	52	28	Standard	0	Female
259	50	38	Standard	0	Female
260	49	25	Standard	3	Female
261	52	18	Standard	0	Male
262	60	39	Standard	2	Male
263	58	14	Standard	2	Female
264	59	27	Standard	0	Female
265	59	21	Standard	0	Female
266	63	35	Standard	4	Female
267	55	28	Standard	3	Female
268	61	62	Standard	4	Male
269	53	22	Standard	2	Male
270	62	21	Standard	0	Female
271	59	22	Standard	0	Female
272	54	32	Segmental	5	Female
273	53	34	Segmental	0	Female
274	63	25	Segmental	2	Male
275	59	20	Segmental	1	Male
276	60	22	Segmental	3	Female
277	64	81	Segmental	6	Male
278	53	23	Segmental	0	Female
279	64	30	Segmental	1	Female
280	53	21	Segmental	0	Female
281	50	15	Segmental	1	Female
282	50	34	Segmental	6	Male
283	67	21	Segmental	2	Male
284	52	18	Segmental	0	Female
285	59	29	Segmental	1	Male
286	61	22	Segmental	0	Female
287	59	29	Segmental	3	Male
288	59	23	Segmental	2	Male
289	60	42	Segmental	3	Female
290	58	36	Segmental	5	Male
291	53	25	Segmental	0	Female
292	57	19	Segmental	0	Male
293	62	29	Segmental	4	Female
294	40	26	Segmental	1	Female
295	72	48	Segmental	1	Female
296	51	20	Segmental	1	Female
297	58	29	Segmental	4	Female
298	55	17	Segmental	2	Male
299	51	42	Segmental	2	Female
300	53	16	Segmental	0	Female
301	60	40	Segmental	6	Female
302	66	38	Segmental	1	Female
303	54	16	Segmental	0	Male
304	51	16	Segmental	0	Female
305	65	39	Segmental	3	Female
306	57	25	Segmental	2	Female
307	54	23	Segmental	1	Female
308	63	46	Segmental	2	Female
309	51	25	Segmental	0	Female
310	69	33	Segmental	0	Female
311	71	31	Segmental	0	Male

## Sheet: Dataset 3
nid	number_of_polyps_1	fellowship	gender_m	age_at_colonoscopy	time_of_the_day_am	bmi	sedation_moderate
1	0	After Starting	0	59	0	32.3	1
2	0	Before Starting	0	62	0	24.2	1
3	1	Before Starting	0	57	1	34.6	1
4	3	After Starting	0	60	1	32	1
5	1	Before Starting	0	63	0	38	1
6	2	After Starting	0	81	1	38.4	1
7	0	Before Starting	0	60	0	32.9	1
8	0	After Starting	1	60	1	18.6	1
9	3	Before Starting	0	58	1	31.4	1
10	0	After Starting	0	55	0	35	1
11	2	After Starting	0	52	1	39	1
12	0	Before Starting	0	60	1	30.3	1
13	2	Before Starting	0	65	1	35.4	1
14	1	Before Starting	0	67	1	29.7	1
15	1	Before Starting	0	69	1	40.4	1
16	4	After Starting	0	68	0	28.8	1
17	0	Before Starting	0	64	1	36	1
18	3	After Starting	0	55	1	27	1
19	2	Before Starting	0	63	1	33.4	1
20	0	After Starting	0	55	0	29.9	1
21	0	Before Starting	0	58	1	42.3	1
22	0	Before Starting	0	51	1	31.9	1
23	0	After Starting	0	55	1	23	1
24	0	After Starting	0	51	1	33	1
25	2	Before Starting	0	60	0	32.2	1
26	2	After Starting	0	54	1	27.5	1
27	1	After Starting	0	61	1	29.2	1
28	0	Before Starting	0	64	1	24.3	1
29	1	After Starting	0	57	0	33.4	1
30	3	After Starting	1	60	1	30	1
31	0	Before Starting	1	74	1	24.2	1
32	1	Before Starting	0	52	0	22.7	1
33	0	After Starting	0	61	1	42	1
34	2	Before Starting	0	54	1	28.9	1
35	1	After Starting	0	52	1	30	1
36	0	After Starting	0	63	1	27.2	1
37	0	After Starting	0	63	1	29.9	1
38	1	Before Starting	1	56	0	29.9	1
39	0	After Starting	0	54	0	39.7	1
40	1	Before Starting	1	57	0	31.4	1
41	2	Before Starting	0	51	1	36	1
42	0	Before Starting	0	62	1	33.3	1
43	0	Before Starting	0	57	0	34.8	1
44	0	After Starting	0	61	0	32.2	1
45	0	After Starting	0	54	1	34	1
46	0	After Starting	0	64	1	40	1
47	0	After Starting	0	63	1	24	1
48	0	After Starting	0	74	1	24.6	1
49	2	Before Starting	0	72	0	33.1	1
50	0	After Starting	1	50	1	27.8	1
51	0	After Starting	0	52	1	32.6	1
52	0	After Starting	0	53	0	25	1
53	1	After Starting	1	62	0	32	1
54	0	Before Starting	0	68	1	29.1	1
55	3	After Starting	1	61	1	35	1
56	0	After Starting	1	60	1	27.8	1
57	3	After Starting	0	54	0	49.4	1
58	0	After Starting	0	71	1	37.8	1
59	0	Before Starting	1	50	0	35.3	0
60	1	Before Starting	0	66	1	30.8	1
61	0	After Starting	0	52	1	29.2	1
62	0	After Starting	0	60	1	24	1
63	0	After Starting	0	57	1	28	1
64	0	After Starting	0	54	1	41.8	1
65	0	After Starting	0	58	1	26.7	1
66	1	After Starting	0	62	1	26.5	1
67	0	Before Starting	0	61	1	25.4	1
68	0	Before Starting	0	69	1	33.8	1
69	1	After Starting	0	72	1	24.7	1
70	3	After Starting	0	58	1	40.4	1
71	0	After Starting	1	64	1	32	1
72	4	After Starting	0	62	1	36.8	1
73	0	After Starting	0	74	1	37	1
74	2	After Starting	0	57	1	31	1
75	0	After Starting	0	52	1	31.4	1
76	2	After Starting	1	54	1	36.5	1
77	1	After Starting	0	60	1	36.5	1
78	0	Before Starting	0	52	1	27.7	1
79	0	Before Starting	1	59	1	27.8	1
80	3	After Starting	0	63	1	35.3	1
81	0	Before Starting	0	54	1	36.2	1
82	1	After Starting	0	56	0	25.7	1
83	1	After Starting	0	55	1	36.8	1
84	1	After Starting	0	65	1	27	1
85	0	Before Starting	0	53	0	29.6	1
86	0	After Starting	0	52	0	29.5	1
87	2	After Starting	0	71	0	29.2	0
88	1	After Starting	0	82	0	28.1	1
89	0	Before Starting	0	65	1	33	1
90	1	After Starting	0	51	1	31.8	1
91	3	After Starting	0	51	1	32.9	1
92	0	Before Starting	0	58	0	37.6	1
93	0	After Starting	0	56	0	50	1
94	3	Before Starting	1	52	0	41.8	1
95	2	After Starting	0	53	1	41.9	1
96	6	After Starting	0	64	1	27.9	1
97	1	Before Starting	0	53	1	35.2	1
98	3	Before Starting	0	60	1	27.7	1
99	3	Before Starting	0	55	0	34	1
100	0	Before Starting	0	65	1	33.1	1
101	5	After Starting	0	59	1	32.4	1
102	0	Before Starting	0	58	1	26.8	1
103	1	Before Starting	0	57	1	26.7	1
104	2	After Starting	0	59	1	34.8	1
105	0	After Starting	0	62	1	26.9	1
106	0	Before Starting	0	75	0	33.3	1
107	1	Before Starting	0	58	0	33.3	1
108	0	Before Starting	0	55	1	20.3	1
109	1	After Starting	0	50	1	30.7	1
110	0	Before Starting	0	66	0	27.9	1
111	0	After Starting	0	74	0	30.3	1
112	0	After Starting	0	56	1	36.1	1
113	1	After Starting	0	63	1	29.5	1
114	0	After Starting	0	56	0	46.5	1
115	3	Before Starting	1	63	1	29.3	1
116	3	After Starting	1	52	0	31.1	1
117	0	Before Starting	0	61	1	24.2	1
118	0	Before Starting	1	77	0	24.5	1
119	0	After Starting	0	57	0	33.2	1
120	0	Before Starting	0	59	1	30.5	1
121	1	Before Starting	0	58	1	32.7	1
122	0	After Starting	0	59	0	30.3	1
123	0	Before Starting	0	59	0	28.4	1
124	0	Before Starting	0	76	1	23.1	1
125	1	After Starting	1	56	1	35.4	1
126	0	After Starting	0	51	1	24.9	1
127	2	Before Starting	0	64	0	46.3	1
128	2	Before Starting	0	50	1	47.9	0
129	1	Before Starting	0	62	0	24	1
130	1	After Starting	0	50	0	22.7	1
131	1	After Starting	0	56	1	33	1
132	1	Before Starting	1	64	0	18.6	1
133	0	After Starting	0	57	0	34.3	1
134	2	After Starting	0	69	1	34.4	1
135	1	After Starting	0	56	1	38.7	1
136	2	After Starting	0	52	0	30.8	1
137	0	Before Starting	0	57	1	34.4	1
138	1	Before Starting	1	53	1	31.7	1
139	1	Before Starting	0	58	1	27.6	1
140	0	After Starting	1	52	0	22.8	1
141	0	Before Starting	0	51	1	30.8	1
142	0	After Starting	0	51	0	29.9	1
143	3	Before Starting	1	57	0	25.4	1
144	2	Before Starting	1	53	0	32.6	1
145	0	After Starting	0	56	0	24	1
146	0	After Starting	0	53	1	25.7	1
147	2	Before Starting	0	50	1	25.8	1
148	1	Before Starting	0	56	1	25.2	1
149	3	Before Starting	0	64	0	28.1	1
150	3	After Starting	0	64	0	42.2	1
151	1	After Starting	0	53	1	29	1
152	0	Before Starting	0	60	1	28.5	1
153	0	After Starting	0	53	1	32	1
154	0	Before Starting	1	54	1	20.6	0
155	0	After Starting	0	55	1	31	1
156	0	After Starting	0	64	0	28.7	1
157	0	After Starting	0	64	1	39.2	1
158	0	Before Starting	0	52	0	36.4	1
159	0	Before Starting	0	50	1	33	1
160	0	Before Starting	0	50	1	24.5	1
161	0	Before Starting	0	53	1	34.9	1
162	0	After Starting	0	56	1	36.9	1
163	0	Before Starting	0	74	1	29.5	1
164	5	After Starting	0	81	1	26.2	1
165	4	After Starting	0	55	0	26.3	1
166	5	After Starting	1	58	1	36.9	1
167	0	After Starting	0	65	1	33	1
168	1	After Starting	0	59	1	29.7	1
169	0	After Starting	0	54	0	30.7	1
170	0	After Starting	0	53	1	27.7	1
171	2	Before Starting	0	55	1	38.3	1
172	0	Before Starting	0	52	0	34.4	1
173	0	Before Starting	0	63	1	28.1	1
174	1	Before Starting	1	55	1	25	1
175	0	Before Starting	0	51	1	35.1	1
176	1	Before Starting	0	57	1	26.4	1
177	0	After Starting	0	56	0	37	1
178	0	Before Starting	0	57	1	27.3	1
179	1	After Starting	0	54	1	32.4	1
180	0	Before Starting	0	56	0	33	1
181	0	After Starting	1	54	0	31.4	1
182	0	Before Starting	1	53	0	39	1
183	3	After Starting	0	66	1	36.5	1
184	0	Before Starting	0	54	1	29.2	1
185	3	After Starting	0	62	1	35.4	1
186	0	Before Starting	0	52	1	25	1
187	0	Before Starting	0	56	1	24.7	1
188	2	After Starting	0	57	1	29.8	1
189	0	After Starting	1	64	0	31.6	1
190	0	Before Starting	0	55	0	31.2	1
191	1	After Starting	0	50	0	29.9	1
192	0	Before Starting	1	58	1	32.7	1
193	1	Before Starting	1	55	0	31.3	1
194	0	After Starting	0	52	1	25.8	1
195	0	Before Starting	0	58	1	31.4	0
196	0	Before Starting	0	72	0	28.4	1
197	3	Before Starting	0	55	1	26.9	1
198	0	Before Starting	1	54	1	30.4	1
199	0	After Starting	0	60	0	24.7	1
200	0	Before Starting	0	54	1	27.8	1
201	1	Before Starting	0	53	1	21.9	1
202	1	Before Starting	0	57	1	30.1	1
203	0	After Starting	0	59	1	25	1
204	2	After Starting	0	56	1	30.8	1
205	0	After Starting	0	55	0	22.5	1
206	0	After Starting	0	58	0	46	1
207	0	After Starting	1	56	1	22	1
208	0	After Starting	0	52	1	28.5	1
209	1	Before Starting	0	53	1	37.6	1
210	0	After Starting	0	50	0	27.4	1
211	4	After Starting	1	63	1	28.8	0
212	1	Before Starting	0	68	1	37.5	1
213	2	After Starting	0	57	1	28.9	1
214	2	Before Starting	0	59	1	33.6	1
215	1	After Starting	0	63	1	23	1
216	1	After Starting	0	51	1	29.3	1
217	1	Before Starting	0	63	0	38.3	1
218	0	Before Starting	0	50	1	23.9	1
219	5	After Starting	1	74	1	22.7	1
220	0	After Starting	1	59	1	25.3	1
221	0	After Starting	0	61	0	21	1
222	0	Before Starting	0	50	0	37.8	1
223	2	Before Starting	1	59	1	22.2	1
224	1	After Starting	0	73	1	31.2	1
225	6	After Starting	0	51	1	27.8	0
226	0	Before Starting	0	73	0	31	1
227	0	After Starting	0	62	1	33.7	1
228	1	After Starting	0	62	1	40.4	1
229	4	After Starting	0	57	1	25	1
230	0	After Starting	0	51	1	29.6	1
231	4	Before Starting	1	53	0	19.5	1
232	4	After Starting	0	50	1	23.4	1
233	0	After Starting	0	61	0	33	1
234	0	After Starting	0	60	1	43	1
235	0	After Starting	0	50	0	27.9	1
236	2	After Starting	1	56	0	45.3	1
237	2	After Starting	0	55	1	40.4	1
238	0	After Starting	1	60	0	26.8	1
239	0	Before Starting	1	73	0	27.4	1
240	0	Before Starting	0	67	1	29.1	1
241	0	After Starting	0	62	1	44.5	1
242	0	After Starting	0	55	0	34.9	1
243	0	After Starting	1	76	0	27.6	1
244	0	After Starting	1	50	0	36.8	1
245	0	After Starting	1	56	1	26.4	1
246	0	After Starting	0	50	1	29.3	1
247	0	Before Starting	1	60	1	32	1
248	0	After Starting	1	52	1	35.9	1
249	0	After Starting	0	55	1	34.3	1
250	0	After Starting	0	54	0	51	1
251	0	Before Starting	0	54	1	25.9	1
252	2	Before Starting	0	51	1	38.8	1
253	0	After Starting	1	54	1	23.6	1
254	0	After Starting	0	56	1	32.9	1
255	2	After Starting	0	54	1	38.6	1
256	1	Before Starting	0	50	1	45	1
257	0	Before Starting	0	59	1	22	1
258	3	After Starting	0	56	1	36.9	1
259	2	After Starting	0	52	1	35.9	1
260	0	After Starting	0	54	0	22.4	1
261	3	Before Starting	0	52	1	32.8	1
262	2	After Starting	0	52	1	35	1
263	0	After Starting	0	58	1	34.7	1
264	0	After Starting	0	72	1	30.3	1
265	0	Before Starting	0	71	1	37.8	1
266	0	After Starting	0	54	1	31.6	1
267	0	After Starting	0	50	0	26	1
268	1	After Starting	0	51	1	40.9	1
269	2	Before Starting	0	61	1	32	1
270	0	Before Starting	0	62	1	42	1
271	1	Before Starting	0	60	0	32.9	1
272	2	Before Starting	1	56	1	24.4	1
273	0	Before Starting	1	60	0	23.8	1
274	1	Before Starting	1	59	1	25.2	1
275	0	Before Starting	0	61	1	30.8	1
276	0	After Starting	1	57	1	29.9	1
277	0	After Starting	0	62	0	27.2	1
278	1	Before Starting	0	50	1	35.4	1
279	0	After Starting	0	50	1	27.3	1
280	3	After Starting	1	75	1	26.1	1
281	0	After Starting	0	60	1	27.6	1
282	2	After Starting	1	52	1	28	1
283	1	After Starting	0	53	1	47	1
284	2	Before Starting	0	65	0	40	1
285	0	Before Starting	1	65	0	32	1
286	1	Before Starting	1	58	0	28.4	1
287	1	After Starting	0	58	1	21.9	1
288	6	Before Starting	1	65	1	38	1
289	0	Before Starting	0	58	1	29.3	1
290	0	After Starting	0	62	1	38.2	1
291	3	Before Starting	0	54	1	38.4	1
292	0	Before Starting	1	63	0	24.6	1
293	0	Before Starting	0	59	0	27.2	1
294	0	Before Starting	0	50	0	32	1
295	0	Before Starting	1	58	0	26.4	1
296	5	Before Starting	1	60	1	25.9	1
297	1	After Starting	1	61	1	33.1	1
298	1	After Starting	1	59	1	32.3	1
299	4	After Starting	0	62	1	30.1	1
300	0	After Starting	1	63	1	26.7	1
301	0	After Starting	0	53	0	30.8	1
302	5	After Starting	0	65	0	30.8	1
303	1	After Starting	0	50	0	35	1
304	0	After Starting	1	54	1	31.5	1
305	2	Before Starting	0	57	1	33.8	1
306	1	Before Starting	1	57	1	37	1
307	1	Before Starting	0	51	1	27.9	1
308	0	After Starting	1	51	1	24.8	1
309	0	Before Starting	0	51	1	31	1
310	0	After Starting	0	61	1	26.6	1
311	5	After Starting	0	60	1	27.7	1
312	0	Before Starting	0	59	0	27.6	1
313	0	After Starting	1	64	0	36.7	1
314	0	Before Starting	0	54	0	35.2	1
315	1	Before Starting	0	63	1	30.1	1
316	1	Before Starting	1	50	0	30.6	1
317	0	After Starting	0	51	0	28.6	1
318	0	Before Starting	0	58	0	26.7	1
319	2	Before Starting	1	54	1	25	1
320	0	After Starting	0	53	1	22.1	1
321	0	Before Starting	0	53	1	26.8	1
322	0	After Starting	0	69	0	38.6	1
323	1	Before Starting	1	55	1	21	1
324	0	After Starting	1	57	0	32.4	1
325	0	Before Starting	0	55	1	25.4	1
326	4	After Starting	0	58	1	30.1	1
327	1	After Starting	1	55	1	24.9	1
328	0	Before Starting	0	62	0	25.6	1
329	2	Before Starting	0	53	0	38.3	1
330	0	Before Starting	0	54	1	26.9	1
331	0	After Starting	0	63	1	32.2	1
332	2	After Starting	1	62	1	29.6	1
333	0	Before Starting	0	64	1	27.7	1
334	2	Before Starting	1	64	1	27.7	1
335	0	Before Starting	0	62	1	24.8	1
336	0	Before Starting	1	72	1	25.4	1
337	3	After Starting	1	52	1	37.6	1
338	0	After Starting	0	52	1	45.2	1
339	0	After Starting	0	54	1	30.7	1
340	0	After Starting	1	57	1	30.5	1
341	0	Before Starting	1	56	1	37.3	1
342	1	After Starting	0	57	0	35.2	1
343	1	After Starting	0	55	0	32.5	1
344	1	Before Starting	0	50	1	39	1
345	1	Before Starting	0	75	1	32.6	1
346	1	Before Starting	0	59	0	33.3	1
347	1	Before Starting	0	55	1	30.4	1
348	0	Before Starting	1	55	1	27.5	1
349	0	Before Starting	0	61	1	19.5	1
350	0	After Starting	0	52	1	34.8	1
351	0	Before Starting	0	51	1	29.9	1
352	2	After Starting	0	55	1	32.9	1
353	0	After Starting	0	50	0	44.6	1
354	0	After Starting	0	51	1	31.7	1
355	1	After Starting	0	50	1	30.6	1
356	1	Before Starting	1	58	1	24.4	1
357	0	After Starting	0	51	1	29.9	1
358	1	After Starting	0	61	1	40.6	1
359	0	After Starting	0	56	0	29.6	1
360	1	Before Starting	0	56	1	31	1
361	1	After Starting	0	57	1	31	1
362	0	After Starting	0	51	0	32.2	1
363	0	Before Starting	1	60	1	33.8	1
364	0	After Starting	0	66	1	35	1
365	0	Before Starting	0	67	1	27.85	1
366	5	Before Starting	1	53	0	26.6	1
367	0	Before Starting	1	55	0	25.04	1
368	2	Before Starting	1	70	1	35.74	1
369	0	Before Starting	0	53	0	25.82	1
370	1	After Starting	0	64	1	30.57	1
371	2	After Starting	0	59	0	45.3	1
372	4	After Starting	1	71	1	28.1	1
373	0	Before Starting	0	51	1	40.96	1
374	1	After Starting	0	52	1	30.61	1
375	0	After Starting	0	52	1	25.2	1
376	0	Before Starting	0	58	1	37.5	1
377	2	After Starting	0	53	1	23.91	1
378	0	Before Starting	0	61	1	25.22	1
379	2	After Starting	1	60	1	25.51	1
380	1	Before Starting	0	61	0	26.72	1
381	0	Before Starting	0	50	1	26.16	1
382	1	After Starting	1	68	1	24.68	1
383	0	After Starting	0	58	1	37.3	1
384	0	After Starting	0	56	1	23.75	1
385	0	Before Starting	0	52	1	21.15	1
386	0	Before Starting	1	59	1	23.92	1
387	1	After Starting	1	70	1	25.56	1
388	3	After Starting	1	62	1	35.6	1
389	2	After Starting	0	57	1	32.9	1
390	0	After Starting	0	52	1	32.76	1
391	4	After Starting	0	52	0	30.6	1
392	0	After Starting	0	59	1	36.45	1
393	0	Before Starting	0	60	1	32.8	1
394	0	Before Starting	0	69	1	50.29	1
395	0	Before Starting	1	56	1	29.2	1
396	0	After Starting	0	51	1	32.5	1
397	0	Before Starting	0	61	0	28.76	1
398	2	Before Starting	0	69	1	25.44	1
399	0	After Starting	0	53	1	44.64	1
400	0	After Starting	0	70	0	29.89	1
401	2	Before Starting	1	59	0	34.24	1
402	1	After Starting	0	62	1	23.49	1
403	0	Before Starting	0	58	0	46.99	1
404	0	After Starting	0	52	1	24	1
405	0	Before Starting	0	57	1	33.75	1
406	1	After Starting	0	51	1	28.97	1
407	2	Before Starting	1	57	0	25.62	0
408	0	Before Starting	0	64	0	31.91	1
409	1	After Starting	1	52	1	31.39	1
410	0	Before Starting	0	66	1	30.16	1
411	2	Before Starting	0	64	1	29.79	1
412	0	Before Starting	0	54	1	25.14	1
413	0	After Starting	0	53	1	42.4	1
414	0	Before Starting	0	54	1	30.05	1
415	0	Before Starting	0	61	1	27.68	1
416	3	Before Starting	0	55	0	34.77	1
417	0	Before Starting	0	60	0	28.67	1
418	0	After Starting	0	66	0	26.53	1
419	0	Before Starting	0	68	0	30.63	1
420	0	Before Starting	0	64	0	27.22	1
421	0	After Starting	0	61	1	34.25	1
422	0	Before Starting	0	52	0	27.17	1
423	0	Before Starting	1	57	1	25.29	1
424	0	After Starting	1	54	1	21.64	1
425	0	Before Starting	0	56	1	32.86	1
426	1	After Starting	0	60	1	22.5	1
427	1	Before Starting	0	51	1	31.77	1
428	2	Before Starting	0	51	1	28.37	1
429	0	After Starting	0	55	1	33	1
430	3	After Starting	0	58	1	32.59	1
431	0	Before Starting	0	57	0	28.78	1
432	0	After Starting	1	59	0	23.24	1
433	0	After Starting	0	63	1	33.5	1
434	1	After Starting	0	65	1	30.38	1
435	2	Before Starting	0	55	1	25.32	1
436	1	After Starting	0	54	1	31.5	1
437	1	Before Starting	1	65	1	35.53	1
438	1	Before Starting	0	70	1	26.58	1
439	0	Before Starting	0	52	0	37.27	1
440	0	Before Starting	0	58	0	39.17	1
441	0	Before Starting	0	55	1	30.46	1
442	0	Before Starting	0	53	1	40.7	1
443	0	Before Starting	0	56	0	29.66	1
444	2	Before Starting	0	61	1	42.11	1
445	2	Before Starting	0	51	1	34.62	1
446	0	Before Starting	0	54	1	35.21	1
447	0	After Starting	1	58	0	39.58	1
448	2	After Starting	1	63	1	35	1
449	1	After Starting	1	78	1	31.12	1
450	4	Before Starting	0	58	0	26.95	1
451	5	Before Starting	1	62	1	23.9	0
452	0	After Starting	0	56	1	26.3	1
453	0	Before Starting	0	59	1	35.49	1
454	0	Before Starting	0	62	1	28.77	1
455	1	After Starting	0	60	1	31.9	1
456	0	After Starting	0	59	1	27.3	1
457	0	After Starting	0	50	1	22.82	1
458	0	Before Starting	0	53	1	27.33	1
459	4	Before Starting	0	53	1	29.49	1
460	1	After Starting	0	59	0	27.68	1
461	0	Before Starting	0	60	0	23.98	1
462	0	After Starting	0	59	1	31.05	1
463	0	After Starting	1	57	1	29.4	1
464	0	Before Starting	1	62	0	24	1
465	0	Before Starting	0	65	1	23.81	1
466	1	After Starting	1	85	1	24.1	1
467	1	Before Starting	0	64	1	27.97	1
468	0	Before Starting	1	63	1	22.72	1
469	0	After Starting	1	52	0	51.4	1
470	0	Before Starting	0	59	1	32.26	1
471	1	Before Starting	0	71	0	26.8	1
472	0	After Starting	0	53	1	30.58	1
473	0	Before Starting	0	56	1	28.43	1
474	2	After Starting	1	53	0	27.1	1
475	2	After Starting	0	63	1	43.79	1
476	0	After Starting	0	52	1	27.98	1
477	0	Before Starting	0	52	0	31.91	1
478	2	Before Starting	0	58	1	26.88	1
479	0	After Starting	1	64	0	23.42	1
480	1	After Starting	0	50	1	30.7	1
481	0	Before Starting	0	51	1	29.35	1
482	0	Before Starting	0	71	0	22.62	1
483	1	Before Starting	0	53	1	31.2	1
484	0	Before Starting	1	52	1	26.51	1
485	0	Before Starting	1	52	0	27.34	1
486	0	After Starting	1	61	0	27.3	1
487	5	After Starting	0	61	1	27.02	1
488	1	After Starting	0	50	0	66.09	0
489	0	After Starting	0	58	0	51.4	1
490	0	After Starting	0	57	0	32.89	1
491	0	After Starting	0	61	1	26.4	1
492	0	Before Starting	1	51	1	25.12	1
493	0	After Starting	0	51	1	31.19	1
494	1	After Starting	0	58	1	23.4	0
495	0	Before Starting	0	50	1	36.61	1
496	1	After Starting	0	57	0	30.36	1
497	0	Before Starting	0	51	1	33.3	1
498	6	After Starting	1	50	1	33.47	1
499	0	Before Starting	0	51	0	28.4	1
500	0	After Starting	0	65	1	29.7	1
501	1	After Starting	0	69	1	30.8	1
502	0	Before Starting	0	58	1	33.1	1
503	2	After Starting	0	50	1	26.19	1
504	0	Before Starting	0	50	1	46.33	1
505	1	Before Starting	0	60	0	25.48	1
506	1	After Starting	1	60	1	33.6	1
507	6	After Starting	0	56	1	44.1	1
508	0	Before Starting	0	58	1	30.72	1
509	0	Before Starting	1	53	1	24.61	1
510	2	After Starting	0	50	1	30.82	1
511	0	After Starting	0	65	1	34.85	1
512	0	Before Starting	0	53	0	31.93	1
513	2	Before Starting	1	52	0	38.16	1
514	0	After Starting	0	51	1	27.9	1
515	0	After Starting	0	62	1	33.1	1
516	1	After Starting	0	51	1	33.8	1
517	3	After Starting	0	51	1	27.9	1
518	0	Before Starting	0	64	0	30.26	1
519	0	After Starting	0	61	1	36.98	1
520	0	Before Starting	0	58	1	28.01	1
521	0	After Starting	0	60	0	44.34	1
522	1	After Starting	1	55	1	28.4	1
523	0	After Starting	0	52	1	41	1
524	1	Before Starting	0	60	1	33.35	1
525	0	After Starting	0	61	0	16.02	1
526	1	After Starting	0	58	0	40.72	1
527	0	After Starting	0	70	0	37.2	1
528	0	After Starting	0	56	1	27.9	1
529	0	Before Starting	0	53	1	28.68	1
530	0	After Starting	0	52	0	26.8	1
531	1	Before Starting	1	53	0	36.55	1
532	1	After Starting	0	61	0	52.53	1
533	2	After Starting	0	53	1	37.69	1
534	0	Before Starting	0	58	1	26.36	1
535	0	Before Starting	1	63	1	25.06	0
536	1	Before Starting	0	52	1	24.99	1
537	0	Before Starting	0	64	1	26.75	1
538	0	After Starting	1	57	0	33.65	1
539	0	Before Starting	0	61	0	24.54	1
540	0	After Starting	0	54	1	38.2	1
541	1	After Starting	0	63	1	29.86	1
542	1	Before Starting	0	56	1	29.38	1
543	0	Before Starting	1	64	1	37.27	1
544	0	After Starting	0	53	0	26.74	1
545	0	Before Starting	0	50	1	35.59	1
546	0	Before Starting	0	58	1	30.98	1
547	0	After Starting	0	62	0	33	1
548	0	Before Starting	0	59	1	23.31	0
549	0	Before Starting	0	51	1	28.22	1
550	1	After Starting	0	50	0	30.12	1
551	0	After Starting	0	63	0	27.5	1
552	1	After Starting	0	59	0	34.6	1
553	0	Before Starting	0	55	0	37.97	1
554	0	After Starting	0	60	1	30.21	1
555	0	Before Starting	0	60	0	33.67	1
556	0	After Starting	0	63	1	33.4	1
557	0	Before Starting	0	63	1	26.14	1
558	0	Before Starting	1	62	0	28.33	1
559	0	After Starting	0	66	0	33.92	1
560	2	After Starting	0	52	1	48.03	0
561	0	Before Starting	1	60	1	25.55	1
562	1	After Starting	1	57	1	30.4	1
563	0	Before Starting	0	52	0	26.69	1
564	0	Before Starting	0	52	0	31.58	1
565	2	After Starting	1	67	1	33.5	1
566	0	Before Starting	0	76	0	24.39	1
567	3	Before Starting	0	62	1	25.2	1
568	0	After Starting	0	69	1	25.7	1
569	0	Before Starting	0	51	0	18.18	1
570	0	Before Starting	0	78	1	29.3	1
571	2	After Starting	0	60	1	36.09	1
572	2	After Starting	1	58	1	33.61	1
573	0	Before Starting	0	58	0	26.92	1
574	0	After Starting	0	52	1	40.03	1
575	0	After Starting	0	59	0	29.38	1
576	0	Before Starting	0	61	1	33.92	1
577	0	After Starting	0	52	1	26.39	1
578	0	After Starting	0	52	0	23.44	1
579	1	After Starting	0	62	1	31.81	1
580	3	After Starting	0	55	1	32.04	1
581	0	After Starting	0	53	1	19.2	1
582	1	After Starting	1	54	1	27.4	1
583	0	After Starting	0	72	0	34.05	1
584	0	After Starting	1	56	1	30	1
585	1	After Starting	1	70	0	30.64	0
586	0	After Starting	0	68	0	33.8	1
587	1	After Starting	0	53	0	29.26	1
588	1	Before Starting	0	68	1	24.87	1
589	0	Before Starting	1	53	1	30.9	1
590	4	After Starting	0	59	1	25.8	1
591	0	Before Starting	1	63	0	27.68	1
592	0	Before Starting	1	51	1	25.66	1
593	1	Before Starting	0	61	1	37.19	1
594	2	After Starting	0	77	1	45.9	1
595	6	After Starting	1	57	0	30.63	1
596	0	After Starting	0	66	0	24.56	1
597	0	Before Starting	1	62	0	26.15	1
598	2	After Starting	1	58	1	26.5	1
599	2	After Starting	1	55	1	28.08	1
600	0	After Starting	0	57	1	32	1
601	0	After Starting	1	59	1	23.39	1
602	1	After Starting	0	61	0	24.98	1
603	1	After Starting	1	59	1	20.2	1
604	0	Before Starting	0	50	1	31.13	1
605	2	Before Starting	1	50	1	30.17	1
606	1	After Starting	0	59	1	26.75	1
607	6	After Starting	1	62	1	25.31	0
608	3	After Starting	1	55	1	30.3	1
609	1	After Starting	1	63	1	30.44	1
610	0	Before Starting	0	51	1	25.69	1
611	5	After Starting	0	54	1	31.8	1
612	0	After Starting	0	51	0	32.7	1
613	0	Before Starting	0	53	1	22.19	1
614	0	After Starting	0	58	1	40.93	1
615	0	Before Starting	0	50	1	34.77	1
616	2	Before Starting	0	58	1	37.92	1
617	0	Before Starting	1	59	0	31.93	1
618	0	After Starting	0	64	1	21	1
619	0	Before Starting	0	57	1	30.3	1
620	0	Before Starting	1	52	0	27.97	1
621	1	After Starting	0	59	1	22.62	1
622	0	After Starting	1	50	1	30.1	1
623	1	After Starting	0	51	1	30.6	1
624	0	After Starting	0	65	0	35.6	1
625	1	After Starting	0	55	1	26.7	1
626	0	After Starting	1	51	1	30	1
627	1	Before Starting	0	56	1	32.17	1
628	2	Before Starting	0	71	1	27.54	1
629	0	Before Starting	0	58	1	33.44	1
630	0	Before Starting	0	59	0	28.66	1
631	1	After Starting	1	58	1	27.2	1
632	0	After Starting	0	55	1	42.5	1
633	2	After Starting	1	64	0	47.57	1
634	1	Before Starting	0	54	1	31.99	1
635	1	After Starting	0	68	0	27.47	1
636	1	Before Starting	0	60	0	35.65	1
637	0	Before Starting	0	54	0	36.46	1
638	3	Before Starting	1	52	1	28.75	1
639	1	After Starting	1	64	1	30.16	1
640	1	After Starting	0	55	1	30.76	1
641	3	After Starting	1	57	1	47.11	1
642	6	Before Starting	1	69	1	24.06	1
643	1	Before Starting	0	54	1	35.35	1
644	0	After Starting	0	53	1	31.93	1
645	3	After Starting	0	62	1	31.74	1
646	4	After Starting	0	72	1	28.91	1
647	2	After Starting	1	50	1	29.5	1
648	0	Before Starting	1	64	0	29.37	1
649	0	Before Starting	0	71	1	31.39	1
650	1	After Starting	1	60	0	24.7	1
651	1	After Starting	0	63	1	28.52	1
652	0	Before Starting	1	56	1	29.37	1
653	1	After Starting	0	63	1	29.41	1
654	0	Before Starting	0	54	0	27.55	1
655	0	Before Starting	1	58	1	22.71	1
656	0	Before Starting	1	57	0	24.78	0
657	1	Before Starting	1	54	1	24.1	1
658	1	Before Starting	1	64	0	23.85	1
659	0	After Starting	0	56	1	28.67	1
660	0	Before Starting	1	58	1	29.87	1
661	0	After Starting	0	64	0	41.8	1
662	0	Before Starting	0	58	0	22.92	1
663	1	After Starting	1	59	0	29.17	1
664	0	After Starting	0	54	0	28.49	1
665	3	After Starting	1	69	0	33.5	1
666	0	Before Starting	0	61	1	30.27	0
667	1	Before Starting	0	56	1	32.71	1
668	0	Before Starting	0	51	0	27.22	1
669	0	After Starting	0	54	1	32.56	1
670	0	Before Starting	0	51	0	43.02	1
671	0	Before Starting	0	58	0	32.63	1
672	1	Before Starting	0	69	0	27.94	1
673	1	Before Starting	0	53	1	33.1	1
674	3	After Starting	1	50	1	31.4	1
675	0	Before Starting	0	76	1	30.3	1
676	3	Before Starting	0	77	1	22.26	1
677	0	Before Starting	1	60	1	29.93	1
678	0	Before Starting	0	52	1	27.15	1
679	1	After Starting	1	53	1	24.57	0
680	1	After Starting	1	50	0	32.11	1
681	0	After Starting	0	64	0	28.36	1
682	0	After Starting	1	59	0	37.82	1
683	1	After Starting	0	59	1	30	1
684	2	Before Starting	1	55	1	32.53	1
685	0	After Starting	0	76	1	31.11	1
686	0	Before Starting	1	50	0	28.03	1
687	2	After Starting	0	51	1	34.4	1
688	0	Before Starting	0	56	1	27.3	1
689	2	Before Starting	0	62	1	30.7	1
690	0	Before Starting	1	61	1	22.49	1
691	0	Before Starting	0	68	1	25.97	1
692	0	After Starting	0	51	1	42.38	1
693	0	After Starting	0	58	0	24.42	1
694	0	Before Starting	0	53	1	29.82	1
695	4	After Starting	1	62	0	22.8	1
696	0	After Starting	1	55	1	50.6	1
697	1	Before Starting	0	59	1	28.27	1
698	1	After Starting	0	54	1	33.7	1
699	0	Before Starting	0	50	0	32.42	1
700	1	After Starting	1	67	1	29.1	1
701	1	Before Starting	0	58	1	34.12	1
702	0	After Starting	0	52	1	28	1
703	0	Before Starting	0	74	1	21.26	1
704	0	Before Starting	0	52	1	28.65	1
705	0	After Starting	1	77	1	30.7	1
706	1	After Starting	0	52	1	36.34	1
707	0	Before Starting	0	57	1	34.4	1
708	0	Before Starting	0	58	1	32.45	1
709	1	After Starting	0	68	1	25.9	1
710	2	After Starting	0	52	1	36.1	1
711	0	After Starting	0	59	0	28.64	1
712	2	Before Starting	0	60	1	26.99	1
713	0	Before Starting	1	71	1	27.46	1
714	1	After Starting	0	64	1	28.7	1
715	0	After Starting	0	53	1	42.87	1
716	1	Before Starting	0	55	0	23.49	1
717	1	After Starting	0	52	1	30.55	1
718	0	After Starting	0	61	1	43	1
719	0	Before Starting	1	58	1	36.92	1
720	3	After Starting	0	57	1	32.1	1
721	2	After Starting	1	61	0	23.84	1
722	4	Before Starting	1	56	1	29.06	1
723	2	After Starting	0	51	1	29.53	1
724	1	Before Starting	0	56	1	27.5	1
725	1	After Starting	0	56	1	27.04	1
726	0	After Starting	0	73	1	28.8	1
727	0	Before Starting	0	54	1	22.1	1
728	6	After Starting	1	53	1	46.2	1
729	1	Before Starting	0	61	1	26.88	1
730	0	After Starting	0	57	0	27.22	1
731	0	Before Starting	0	56	1	41.65	1
732	1	Before Starting	0	61	0	29.71	1
733	0	After Starting	0	51	1	33.3	1
734	3	Before Starting	1	59	1	34.13	1
735	3	Before Starting	1	57	1	28.37	1
736	4	Before Starting	0	52	1	41.52	1
737	2	After Starting	0	58	1	25.2	0
738	0	After Starting	1	50	1	22	1
739	1	After Starting	1	52	1	32.1	1
740	0	Before Starting	0	60	0	27.5	1
741	0	Before Starting	0	65	0	26.25	1
742	2	After Starting	0	57	0	33.4	1
743	1	After Starting	0	50	0	34.2	1
744	1	Before Starting	0	62	0	36.39	1
745	1	After Starting	0	66	1	42.93	1
746	1	Before Starting	1	63	1	23.03	1
747	1	After Starting	0	56	1	28.81	1
748	2	Before Starting	1	54	1	35.08	1
749	0	After Starting	1	65	1	27.2	1
750	1	Before Starting	0	65	0	33.33	1
751	0	After Starting	0	54	1	21.83	1
752	1	After Starting	0	57	0	30.47	1
753	0	Before Starting	0	57	1	30.25	1
754	0	Before Starting	0	56	0	29.22	1
755	0	After Starting	0	54	1	25.59	1
756	3	Before Starting	0	53	0	28.9	1
757	0	Before Starting	0	53	1	30.24	1
758	1	Before Starting	0	83	0	28.83	1
759	1	After Starting	1	56	1	25.23	1
760	1	Before Starting	0	55	1	21.91	1
761	1	After Starting	0	54	1	35.9	1
762	0	Before Starting	0	62	0	40	1
763	0	Before Starting	0	63	0	37.67	1
764	0	Before Starting	0	60	1	26.93	1
765	0	After Starting	0	51	1	29.5	1
766	0	After Starting	0	61	0	33.1	1
767	6	After Starting	0	58	1	33.3	1
768	2	After Starting	0	57	1	35.4	1
769	1	Before Starting	0	52	1	34.8	1
770	0	Before Starting	0	56	1	20.85	1
771	0	Before Starting	0	56	1	27.92	1
772	0	After Starting	0	59	1	23.94	1
773	5	After Starting	1	53	0	36.84	1
774	1	Before Starting	1	57	1	20.1	1
775	0	Before Starting	0	60	1	28.76	1
776	0	After Starting	0	63	0	33.7	1
777	0	After Starting	0	55	1	27.51	1
778	0	Before Starting	1	52	1	43.05	1
779	0	Before Starting	0	51	0	28.6	1
780	1	After Starting	1	69	0	25.7	1
781	0	After Starting	1	75	1	29.09	1
782	0	Before Starting	0	50	0	22.7	1
783	2	After Starting	0	61	1	32.8	1
784	1	After Starting	0	55	1	23.94	1
785	0	Before Starting	0	53	1	22.11	1
786	0	Before Starting	1	56	1	30.8	1
787	3	After Starting	1	55	1	33.84	0
788	2	Before Starting	1	54	1	31.25	1
789	1	Before Starting	1	57	1	29.52	1
790	0	After Starting	0	56	0	23.34	1
791	1	After Starting	0	52	1	26.4	1
792	0	Before Starting	0	59	1	33.8	1
793	0	After Starting	0	63	0	31.64	1
794	2	Before Starting	0	63	1	31.47	1
795	0	After Starting	0	56	1	43.28	1
796	1	After Starting	0	61	0	26.3	1
797	0	Before Starting	1	54	0	38.37	1
798	0	Before Starting	0	58	1	28.7	1
799	0	After Starting	1	55	0	31.09	1
800	0	After Starting	0	68	1	21.52	1
801	3	After Starting	0	64	1	42.4	1
802	4	After Starting	1	63	1	30.1	1
803	1	After Starting	0	50	0	35.6	1
804	1	Before Starting	0	56	1	27.95	1
805	0	Before Starting	0	72	1	24.64	1
806	0	Before Starting	0	61	0	38.2	1
807	0	After Starting	0	53	0	23.66	1
808	0	After Starting	0	59	1	28.31	1
809	3	After Starting	1	64	1	23.51	1
810	0	Before Starting	0	62	0	25.2	1
811	0	Before Starting	0	54	1	28.98	1
812	0	Before Starting	1	65	0	31.56	1
813	0	Before Starting	0	69	1	28.41	1
814	1	Before Starting	0	55	1	27.8	1
815	2	Before Starting	1	60	1	28	1
816	0	Before Starting	0	71	1	23.66	1
817	0	After Starting	0	50	1	27.8	1
818	1	After Starting	0	61	1	30.6	1
819	0	Before Starting	0	53	1	32.17	1
820	5	After Starting	0	52	0	28.87	1
821	0	Before Starting	1	60	1	29.1	1
822	1	Before Starting	1	80	0	30.79	1
823	0	Before Starting	0	62	0	18.8	1
824	5	After Starting	0	52	1	28.1	1
825	0	Before Starting	0	62	0	43.05	1
826	0	Before Starting	0	56	0	29.97	1
827	0	After Starting	0	58	0	35.9	1
828	1	Before Starting	0	55	1	42.88	1
829	1	After Starting	0	52	1	28	1
830	0	Before Starting	0	55	1	28.5	1
831	0	Before Starting	0	63	0	22.5	1
832	1	After Starting	0	54	1	25	1
833	1	Before Starting	0	60	1	32.79	1
834	0	After Starting	0	75	1	30	1
835	0	Before Starting	0	54	0	27.71	1
836	0	Before Starting	0	53	1	27.17	1
837	2	Before Starting	1	69	0	35.04	1
838	0	After Starting	0	54	1	20.5	1
839	1	Before Starting	0	60	0	32.53	1
840	0	After Starting	0	55	1	33.1	1
841	0	After Starting	0	50	1	26.5	1
842	1	Before Starting	0	62	1	41.5	1
843	0	Before Starting	0	64	0	29.18	0
844	1	Before Starting	0	56	0	38.01	1
845	1	After Starting	1	50	1	27.93	1
846	0	Before Starting	1	60	1	23.64	1
847	0	Before Starting	0	64	1	32.03	1
848	2	After Starting	0	55	1	36.52	1
849	0	Before Starting	0	64	1	25.32	1
850	1	After Starting	0	58	1	37.81	1
851	0	After Starting	0	55	1	59.6	1
852	0	Before Starting	0	55	1	28.61	1
853	0	Before Starting	0	59	1	35.8	1
854	0	Before Starting	0	69	1	33.06	1
855	0	After Starting	0	53	1	34.4	1
856	0	After Starting	1	51	1	33.4	1
857	1	After Starting	1	57	1	29.06	1
858	0	After Starting	1	51	1	27.1	0
859	0	Before Starting	1	61	0	49.4	1
860	1	After Starting	0	55	1	30.88	1
861	2	Before Starting	1	67	0	25.31	1
862	0	After Starting	0	60	1	33.76	1
863	5	After Starting	0	59	1	31.97	1
864	1	After Starting	0	54	1	27.7	1
865	0	Before Starting	1	57	0	28.4	1
866	0	After Starting	0	62	0	31.8	1
867	0	Before Starting	0	68	1	24	1
868	0	Before Starting	0	65	0	31.42	1
869	0	Before Starting	0	59	0	22.85	1
870	0	Before Starting	0	58	1	49.64	1
871	0	Before Starting	0	61	1	31.24	1
872	0	Before Starting	0	51	1	28.27	1
873	0	After Starting	0	54	1	39.64	1
874	3	After Starting	0	59	0	23.89	1
875	0	Before Starting	0	62	1	28	1
876	1	Before Starting	1	80	1	26.65	1
877	0	Before Starting	0	51	0	39.31	1
878	1	After Starting	1	61	0	27.75	1
879	0	Before Starting	1	59	0	29.94	1
880	1	After Starting	0	50	0	34.1	1
881	0	After Starting	0	62	1	29.8	1
882	0	Before Starting	0	54	1	65.5	1
883	1	Before Starting	0	55	1	35.5	1
884	0	Before Starting	0	50	1	34.02	0
885	0	After Starting	0	50	0	29.6	1
886	0	After Starting	0	50	1	30.5	1
887	0	After Starting	0	60	1	44.5	1
888	0	After Starting	0	58	1	37.8	1
889	0	After Starting	0	57	0	24.7	1
890	0	Before Starting	0	62	1	28.48	1
891	0	After Starting	0	50	0	27.04	1
892	2	After Starting	1	68	1	28.5	1
893	0	Before Starting	0	51	1	27.95	1
894	0	Before Starting	1	63	0	29.54	1
895	0	After Starting	0	51	0	68	1
896	0	After Starting	0	50	1	31.97	1
897	2	Before Starting	1	50	1	38.8	0
898	0	Before Starting	1	52	1	33.12	1
899	0	After Starting	1	54	0	27.4	1
900	0	After Starting	1	69	0	22.86	1
901	0	After Starting	0	56	1	53.32	0
902	0	Before Starting	1	50	1	30.58	1
903	1	After Starting	0	61	1	29.3	1
904	1	Before Starting	0	54	0	22.96	1
905	0	Before Starting	1	54	0	27.2	1
906	0	Before Starting	0	55	1	28.1	1
907	0	After Starting	0	53	1	31.5	1
908	4	After Starting	0	55	1	32	1
909	0	After Starting	0	64	0	28.43	1
910	0	After Starting	0	62	1	31.4	1
911	0	Before Starting	1	61	0	24.49	0
912	0	After Starting	0	59	0	24.52	1
913	2	After Starting	0	60	1	41.7	1
914	1	After Starting	1	55	1	34.51	1
915	0	After Starting	0	51	0	28	1
916	1	Before Starting	0	58	1	32.9	1
917	6	After Starting	1	67	1	15.9	1
918	0	Before Starting	1	65	1	42.83	1
919	1	Before Starting	0	52	1	34.9	1
920	0	Before Starting	0	64	0	27.2	1
921	0	Before Starting	1	53	0	31.6	1
922	0	After Starting	1	50	1	26.64	1
923	0	Before Starting	1	56	1	28.98	1
924	0	Before Starting	1	61	1	26.64	1
925	0	Before Starting	0	72	1	20.17	1
926	2	After Starting	1	53	1	37.48	1
927	0	Before Starting	1	65	0	35.52	1
928	3	After Starting	0	61	1	34.46	1
929	1	Before Starting	0	55	0	38.56	1
930	0	After Starting	0	51	0	21.26	0
931	0	Before Starting	0	50	1	27.3	1
932	0	Before Starting	0	53	1	34.15	1
933	0	Before Starting	0	64	0	24.93	1
934	0	After Starting	0	58	1	30.4	1
935	0	After Starting	0	59	1	26.3	1
936	2	After Starting	1	50	1	30.7	1
937	1	Before Starting	0	62	1	36.35	1
938	0	Before Starting	0	52	0	35.09	1
939	1	After Starting	0	56	1	24.9	1
940	0	Before Starting	0	50	0	42	1
941	5	After Starting	0	84	1	16.1	1
942	0	Before Starting	0	59	1	28.36	1
943	3	Before Starting	0	51	1	34.48	1
944	0	Before Starting	0	61	1	37.63	1
945	0	Before Starting	0	62	1	24.8	1
946	0	Before Starting	0	50	1	28.27	1
947	0	After Starting	0	52	1	39.9	1
948	0	After Starting	0	51	1	31.5	1
949	0	Before Starting	0	61	1	36.92	1
950	0	After Starting	1	54	0	31.2	1
951	1	After Starting	0	58	1	27.36	1
952	0	Before Starting	0	60	1	22.6	1
953	2	Before Starting	1	61	0	28.5	1
954	1	Before Starting	0	62	1	25.8	1
955	1	Before Starting	1	53	0	34.71	1
956	1	Before Starting	0	69	0	28.11	1
957	0	Before Starting	0	66	0	30.57	1
958	0	Before Starting	0	67	1	28.18	1
959	1	Before Starting	0	58	0	23.9	1
960	1	After Starting	0	64	1	31.05	1
961	0	Before Starting	0	55	0	29.55	1
962	1	Before Starting	0	62	0	27.27	1
963	6	After Starting	1	59	1	26.8	1
964	1	After Starting	1	67	1	28.16	1
965	4	After Starting	1	66	0	40.2	1
966	2	After Starting	1	57	1	36.9	1
967	1	Before Starting	0	64	1	32.45	1
968	0	After Starting	0	60	0	38.6	1
969	0	After Starting	0	69	0	30.78	1
970	3	Before Starting	0	52	1	38.15	1
971	0	After Starting	1	58	1	35.2	1
972	0	After Starting	0	53	0	29.43	1
973	1	After Starting	0	68	1	27.9	1
974	1	After Starting	0	65	0	31.7	1
975	1	After Starting	0	59	1	32.72	1
976	0	After Starting	0	63	1	25.03	1
977	2	After Starting	0	62	1	31.21	1
978	1	After Starting	0	60	1	28.61	1
979	0	After Starting	0	63	1	38.6	1
980	1	Before Starting	0	69	1	34.2	1
981	0	Before Starting	1	53	1	34.43	1
982	0	Before Starting	0	59	0	37.39	1
983	6	After Starting	0	58	0	35	1
984	0	Before Starting	0	60	1	24.87	1
985	0	After Starting	1	59	0	29	1
986	1	Before Starting	0	51	1	20.87	1
987	0	After Starting	0	58	0	34.2	1
988	0	Before Starting	1	55	0	34.71	1
989	0	Before Starting	1	64	0	28.91	1
990	1	After Starting	1	51	1	29.05	1
991	1	Before Starting	0	60	0	40.85	1
992	1	After Starting	1	69	1	27.7	1
993	0	Before Starting	1	61	0	25.64	1
994	2	Before Starting	1	51	1	25.7	1
995	2	Before Starting	1	58	0	29.38	1
996	3	After Starting	0	53	1	38.2	1
997	0	Before Starting	0	64	0	40.8	1
998	1	After Starting	1	51	1	28.6	1
999	2	Before Starting	0	62	0	29.29	1
1000	0	After Starting	0	58	0	40.3	1
1001	1	After Starting	0	80	0	26.28	1
1002	0	After Starting	0	58	1	31.9	1
1003	0	Before Starting	0	61	1	33.63	1
1004	1	Before Starting	1	62	1	31.17	1
1005	2	After Starting	0	61	1	30	1
1006	0	Before Starting	1	52	0	27.65	1
1007	1	Before Starting	1	56	0	27.35	1
1008	0	Before Starting	0	54	1	34.79	1
1009	1	After Starting	0	56	1	27.2	1
1010	0	After Starting	0	57	1	37.7	1
1011	2	After Starting	0	59	0	28.1	1
1012	0	Before Starting	0	65	1	26.31	1
1013	0	Before Starting	0	58	1	30.23	1
1014	0	Before Starting	0	55	1	28.29	1
1015	0	Before Starting	1	52	1	30.8	1
1016	0	After Starting	1	62	1	29.7	1
1017	1	Before Starting	0	57	1	31.91	1
1018	1	After Starting	0	53	1	32.4	1
1019	0	After Starting	1	70	1	32.8	1
1020	0	After Starting	0	50	0	32.94	1
1021	0	Before Starting	0	63	1	30.19	1
1022	0	After Starting	0	54	1	28.5	1
1023	1	After Starting	1	60	1	31.5	1
1024	0	Before Starting	0	77	0	25.33	1
1025	1	After Starting	0	71	1	33.1	1
1026	1	Before Starting	0	54	1	44.56	1
1027	0	After Starting	0	63	1	29.5	1
1028	1	Before Starting	0	53	0	28.44	1
1029	0	After Starting	0	53	0	33.01	1
1030	1	Before Starting	0	79	1	30.18	1
1031	0	Before Starting	0	66	1	37.78	1
1032	1	Before Starting	1	61	1	28.7	1
1033	0	After Starting	0	59	0	43.43	1
1034	2	Before Starting	0	55	1	28.04	1
1035	0	Before Starting	0	62	0	26.55	1
1036	0	Before Starting	1	50	1	25.06	1
1037	0	Before Starting	0	65	1	20.17	1
1038	0	After Starting	0	54	1	28.71	1
1039	3	After Starting	0	60	1	27.2	1
1040	0	Before Starting	0	56	0	40.57	1
1041	0	After Starting	0	53	1	19.47	1
1042	1	After Starting	0	65	1	25.5	1
1043	1	After Starting	1	51	0	25	1
1044	0	Before Starting	0	61	1	25.2	1
1045	2	Before Starting	0	56	1	37.6	1
1046	1	After Starting	0	73	1	25	1
1047	0	Before Starting	1	62	0	25.85	1
1048	0	Before Starting	0	50	1	30.3	1
1049	0	After Starting	1	67	0	30.5	1
1050	0	After Starting	0	54	1	29.9	1
1051	3	Before Starting	1	56	0	33.6	1
1052	0	After Starting	1	60	1	29.5	1
1053	2	Before Starting	1	63	1	31.38	1
1054	0	Before Starting	1	58	0	23.18	1
1055	4	Before Starting	1	52	0	34.41	1
1056	0	Before Starting	0	54	0	35.55	1
1057	0	After Starting	0	62	0	35.46	1
1058	0	Before Starting	0	65	1	29.48	1
1059	1	After Starting	0	65	0	27.7	1
1060	0	Before Starting	0	73	0	21.21	1
1061	1	Before Starting	0	57	0	40.13	1
1062	0	After Starting	0	54	1	32.46	1
1063	0	After Starting	0	52	1	32	1
1064	0	After Starting	1	56	1	29.4	1
1065	3	Before Starting	1	61	1	23.65	1
1066	0	Before Starting	1	63	0	30.1	1
1067	1	After Starting	0	51	1	34.56	1
1068	1	After Starting	0	54	0	28.8	1
1069	0	Before Starting	0	60	1	26.9	1
1070	0	After Starting	1	59	1	32.07	1
1071	0	After Starting	0	57	1	26.7	1
1072	0	After Starting	1	60	1	30.5	1
1073	0	Before Starting	0	58	1	31.6	1
1074	1	After Starting	0	64	0	31.09	1
1075	0	Before Starting	0	60	0	42.59	1
1076	2	Before Starting	0	69	1	34.61	1
1077	1	After Starting	0	63	1	38	1
1078	0	After Starting	0	54	1	33.83	1
1079	0	Before Starting	1	57	0	30.8	1
1080	0	Before Starting	0	62	0	30.59	1
1081	0	Before Starting	0	56	0	35.1	1
1082	0	After Starting	1	62	1	28.16	1
1083	1	Before Starting	0	62	1	30.36	1
1084	2	After Starting	1	64	1	26.57	1
1085	0	After Starting	0	61	1	30.6	1
1086	0	Before Starting	0	53	1	22.84	1
1087	2	After Starting	0	52	1	33.79	1
1088	4	After Starting	1	56	1	38.06	1
1089	1	After Starting	0	63	0	34	1
1090	1	Before Starting	0	59	1	30.86	1
1091	1	Before Starting	1	70	1	30.85	1
1092	0	After Starting	0	64	1	28.2	1
1093	2	After Starting	0	55	1	33.96	1
1094	0	Before Starting	0	61	1	25.42	1
1095	1	After Starting	1	59	1	29.41	1
1096	6	After Starting	0	76	1	30.71	1
1097	0	Before Starting	0	52	1	26.6	1
1098	2	After Starting	0	56	0	27.87	1
1099	1	Before Starting	0	60	1	27.5	1
1100	0	Before Starting	0	59	1	30.67	1
1101	0	After Starting	0	50	0	36.66	1
1102	3	Before Starting	1	57	1	30.1	1
1103	1	Before Starting	0	57	1	29.98	1
1104	0	After Starting	0	50	1	35.23	1
1105	0	After Starting	0	58	1	31.12	1
1106	2	Before Starting	1	58	1	26.99	1
1107	0	Before Starting	0	63	0	32.77	1
1108	2	Before Starting	0	63	1	23.35	1
1109	0	Before Starting	1	50	1	33.08	1
1110	0	After Starting	0	58	1	23.95	1
1111	0	Before Starting	0	50	1	29.89	1
1112	0	Before Starting	0	66	0	24.63	1
1113	0	Before Starting	0	58	1	28.55	1
1114	2	Before Starting	1	62	1	38.47	1
1115	2	After Starting	0	50	1	31.91	1
1116	0	Before Starting	0	59	1	31.06	1
1117	0	Before Starting	0	71	1	38.9	1
1118	1	After Starting	0	53	0	39.11	1
1119	0	After Starting	1	60	1	33.41	1
1120	0	Before Starting	0	55	1	32.84	1
1121	0	Before Starting	0	52	1	28	1
1122	0	Before Starting	0	52	1	33.75	1
1123	1	Before Starting	0	59	1	27.6	1
1124	0	After Starting	1	61	0	28.7	1
1125	1	After Starting	0	51	1	33.5	1
1126	4	After Starting	1	61	1	23.7	1
1127	0	Before Starting	1	66	1	28.5	1
1128	1	After Starting	0	60	1	26.8	1
1129	0	After Starting	0	63	1	35.5	1
1130	0	Before Starting	1	57	1	33.52	1
1131	0	Before Starting	1	62	1	29.7	1
1132	1	Before Starting	0	53	1	28.3	1
1133	0	Before Starting	1	64	0	34.55	1
1134	2	Before Starting	0	59	1	29.33	1
1135	2	Before Starting	0	51	0	22.1	1
1136	0	Before Starting	0	65	0	30.86	1
1137	4	Before Starting	0	63	1	33.01	1
1138	0	Before Starting	1	58	1	41.63	1
1139	0	After Starting	0	56	1	26.83	1
1140	1	Before Starting	0	66	1	31.75	1
1141	1	After Starting	0	63	1	30.59	1
1142	1	After Starting	1	66	1	20.1	1
1143	4	After Starting	1	76	1	22.35	1
1144	0	After Starting	0	65	1	28	1
1145	2	After Starting	0	64	1	31.56	1
1146	0	After Starting	1	58	1	27.96	1
1147	0	Before Starting	1	52	0	35.45	1
1148	1	Before Starting	0	50	0	25.59	1
1149	0	Before Starting	0	57	0	27.51	1
1150	2	After Starting	1	74	1	25.64	1
1151	0	After Starting	0	54	0	31.17	1
1152	0	Before Starting	0	54	1	26.92	1
1153	0	Before Starting	0	78	0	21.38	1
1154	3	After Starting	0	62	1	29.86	1
1155	0	Before Starting	1	53	1	33.38	1
1156	3	After Starting	0	77	1	28.15	1
1157	0	Before Starting	1	59	1	37.33	1
1158	0	Before Starting	1	50	0	32.03	1
1159	0	Before Starting	0	56	0	24.67	1
1160	0	Before Starting	0	64	1	34.8	1
1161	1	After Starting	0	59	1	22.3	1
1162	0	Before Starting	1	65	1	32.38	1
1163	0	After Starting	0	61	0	33.79	1
1164	0	Before Starting	1	57	1	34.81	1
1165	4	After Starting	0	54	1	32.2	1
1166	0	After Starting	1	64	0	29.73	1
1167	0	After Starting	0	54	1	29.24	1
1168	2	After Starting	1	57	1	34.02	1
1169	0	After Starting	0	63	0	24.8	1
1170	0	Before Starting	0	71	0	28.83	0
1171	0	After Starting	0	60	1	27.8	1
1172	0	After Starting	1	65	0	24.5	1
1173	0	Before Starting	0	51	1	32.55	1
1174	0	Before Starting	1	55	0	55.3	1
1175	0	Before Starting	0	53	0	23.01	1
1176	0	Before Starting	0	65	1	22.5	1
1177	0	After Starting	0	66	1	33.5	1
1178	1	Before Starting	0	54	0	25.96	1
1179	0	Before Starting	1	76	1	22.69	1
1180	2	After Starting	1	58	1	33.3	1
1181	2	After Starting	1	51	1	32.87	1
1182	1	Before Starting	1	58	0	47.7	1
1183	3	Before Starting	1	59	0	27.75	1
1184	5	After Starting	1	56	1	29.7	1
1185	0	After Starting	0	51	1	31.24	1
1186	0	After Starting	0	60	1	44.9	1
1187	0	Before Starting	1	52	1	29.49	0
1188	2	Before Starting	0	64	0	33.27	1
1189	1	After Starting	0	63	1	25.81	1
1190	1	Before Starting	1	60	0	26.23	1
1191	0	Before Starting	0	50	1	34.3	1
1192	0	Before Starting	1	61	0	25.98	1
1193	1	After Starting	0	58	1	28	1
1194	0	Before Starting	0	66	1	39.74	1
1195	1	After Starting	1	66	1	25.8	1
1196	0	Before Starting	1	61	0	26.5	1
1197	0	Before Starting	1	58	1	30.84	1
1198	1	After Starting	0	55	1	29.8	1
1199	1	After Starting	1	57	1	27.1	1
1200	2	After Starting	0	58	1	26.8	1
1201	0	Before Starting	0	54	0	33.67	1
1202	5	After Starting	0	63	1	37.9	1
1203	2	After Starting	1	61	1	34.6	1
1204	0	After Starting	1	50	0	36	1
1205	2	After Starting	0	51	1	27.2	1
1206	0	Before Starting	0	60	0	28.5	1
1207	1	Before Starting	0	53	1	28.89	1
1208	2	After Starting	0	56	1	29	1
1209	1	After Starting	1	77	1	26.25	1
1210	0	After Starting	0	58	1	30.8	1
1211	0	Before Starting	0	57	0	36.15	1
1212	3	Before Starting	0	69	0	26.75	1
1213	0	After Starting	0	51	0	35.91	1
1214	0	After Starting	0	68	1	23.59	1
1215	0	Before Starting	0	53	0	24.76	1
1216	0	Before Starting	0	58	1	25.02	1
1217	0	After Starting	0	59	1	41.6	1
1218	1	Before Starting	0	64	1	28.38	1
1219	0	After Starting	0	57	1	28.7	1
1220	0	Before Starting	0	62	1	23.03	1
1221	4	After Starting	0	56	1	31.3	1
1222	1	Before Starting	0	67	1	29.13	1
1223	1	Before Starting	1	64	0	30.01	1
1224	5	Before Starting	0	65	1	40.25	1
1225	0	After Starting	0	53	1	22.11	1
1226	0	Before Starting	0	58	1	36	1
1227	0	After Starting	0	52	1	27.2	1
1228	0	After Starting	0	55	1	38.8	1
1229	0	Before Starting	0	55	0	30.7	1
1230	0	After Starting	0	53	1	29.2	1
1231	0	Before Starting	1	53	1	30.19	1
1232	0	Before Starting	1	65	1	31.9	1
1233	6	After Starting	0	63	1	21.6	1
1234	1	After Starting	0	57	1	28.91	1
1235	1	After Starting	0	55	1	33.56	1
1236	2	After Starting	0	54	0	33.5	1
1237	1	Before Starting	1	60	0	24.57	1
1238	1	Before Starting	0	54	1	31.93	1
1239	3	Before Starting	0	58	0	41.8	1
1240	0	Before Starting	1	60	1	37.04	1
1241	0	After Starting	1	53	1	26.4	1
1242	2	After Starting	0	50	1	33.11	1
1243	0	After Starting	0	54	0	30.3	1
1244	1	Before Starting	0	63	1	38.3	1
1245	0	Before Starting	0	52	1	41.85	1
1246	1	After Starting	0	61	0	38.5	1
1247	1	Before Starting	0	60	0	24.84	1
1248	0	After Starting	1	65	1	35	1
1249	1	After Starting	1	52	1	30.2	1
1250	2	After Starting	1	63	1	34.8	1
1251	0	After Starting	0	61	1	26	1
1252	0	After Starting	1	63	0	30.1	1
1253	0	Before Starting	0	62	1	36.57	1
1254	0	After Starting	1	57	1	29.3	1
1255	1	After Starting	1	53	1	29.6	1
1256	0	Before Starting	1	58	0	29.22	1
1257	1	After Starting	0	72	0	35.7	1
1258	1	After Starting	0	55	0	45.52	1
1259	0	Before Starting	1	52	1	29.42	1
1260	1	After Starting	0	54	0	22.51	1
1261	0	Before Starting	1	57	1	22.33	1
1262	0	Before Starting	0	58	0	34.61	1
1263	0	Before Starting	1	57	0	27.66	1
1264	1	Before Starting	0	58	1	31.16	1
1265	0	Before Starting	0	50	1	28.42	1
1266	0	Before Starting	1	70	1	25.22	1
1267	0	Before Starting	1	51	0	32	1
1268	0	Before Starting	0	54	0	29.86	1
1269	0	After Starting	1	60	1	24.9	1
1270	0	After Starting	0	63	0	31.6	1
1271	1	Before Starting	1	60	1	30.96	1
1272	0	Before Starting	0	61	1	29.31	1
1273	0	After Starting	0	53	1	41.21	1
1274	0	Before Starting	0	76	1	31.85	1
1275	2	Before Starting	1	76	0	27.61	1
1276	0	Before Starting	0	53	1	31.58	1
1277	0	Before Starting	0	70	1	43.1	1
1278	5	After Starting	0	63	1	24.8	1
1279	0	Before Starting	0	56	0	33.91	1
1280	0	Before Starting	1	61	1	21.89	1
1281	0	Before Starting	0	51	1	21.91	1
1282	2	Before Starting	1	59	1	25	0
1283	0	After Starting	0	55	0	28.8	1
1284	0	Before Starting	1	50	0	31.04	1
1285	0	Before Starting	0	55	0	30.3	1
1286	2	After Starting	0	63	1	31.1	1
1287	0	After Starting	0	55	1	22.63	1
1288	0	After Starting	0	51	0	33.25	1
1289	0	Before Starting	1	64	1	28.5	1
1290	0	Before Starting	1	58	0	28.95	1
1291	0	Before Starting	0	72	0	30	1
1292	1	Before Starting	0	61	0	34.55	1
1293	1	Before Starting	1	58	0	31.1	1
1294	1	After Starting	0	50	1	28.44	1
1295	0	After Starting	1	50	0	30.55	1
1296	0	After Starting	0	60	0	39.46	1
1297	0	Before Starting	0	73	1	26.72	1
1298	2	Before Starting	1	56	0	28.55	1
1299	0	Before Starting	1	63	1	27.77	1
1300	1	Before Starting	1	50	1	32.72	1
1301	0	After Starting	1	51	1	29.56	1
1302	0	Before Starting	0	57	1	29.3	1
1303	0	After Starting	1	60	1	27.7	1
1304	1	Before Starting	0	58	0	27.06	1
1305	0	After Starting	0	60	0	42.5	1
1306	0	After Starting	0	61	1	31.3	1
1307	0	After Starting	0	51	1	20.94	1
1308	0	Before Starting	0	62	1	37.11	1
1309	0	Before Starting	0	56	1	29.49	1
1310	0	After Starting	1	50	0	27.82	1
1311	0	After Starting	1	62	1	32.3	1
1312	2	Before Starting	0	53	0	48.15	1
1313	0	After Starting	0	62	1	30.1	1
1314	1	After Starting	1	62	1	41.3	1
1315	1	After Starting	1	66	1	33.6	1
1316	2	Before Starting	0	71	1	27.78	1
1317	0	Before Starting	0	51	1	29.98	1
1318	0	Before Starting	0	51	0	40.82	1
1319	0	After Starting	0	52	1	29.2	1
1320	0	Before Starting	0	60	1	29.66	1
1321	0	After Starting	1	51	1	27.7	1
1322	0	Before Starting	1	50	1	29.39	1
1323	5	After Starting	0	67	1	28.68	1
1324	1	Before Starting	1	59	1	28.72	1
1325	0	After Starting	0	63	1	30	1
1326	0	After Starting	0	50	1	31.3	1
1327	0	After Starting	1	55	1	25.5	1
1328	0	Before Starting	0	57	1	36.4	1
1329	1	After Starting	1	50	1	23	1
1330	0	After Starting	1	69	1	30.1	1
1331	0	Before Starting	1	52	1	28.59	1
1332	1	After Starting	1	54	0	33.8	1
1333	0	Before Starting	0	56	1	37.38	1
1334	0	Before Starting	0	66	0	23.52	1
1335	6	After Starting	1	72	1	40.7	1
1336	4	Before Starting	1	63	1	27.4	1
1337	2	Before Starting	1	75	1	30.29	1
1338	1	Before Starting	0	54	1	30.8	1
1339	0	Before Starting	0	61	0	26.51	1
1340	0	Before Starting	0	57	0	34.71	1
1341	0	After Starting	0	64	0	25.39	1
1342	0	After Starting	1	50	1	26.79	1
1343	0	Before Starting	0	61	1	24.73	1
1344	1	After Starting	1	57	1	32.9	1
1345	0	Before Starting	0	58	1	34.74	1
1346	0	Before Starting	0	74	1	19.96	1
1347	0	After Starting	0	73	0	24.4	1
1348	1	Before Starting	0	64	1	30.66	1
1349	0	After Starting	1	64	1	23.1	1
1350	0	Before Starting	1	64	1	29.26	1
1351	1	After Starting	0	58	1	26	1
1352	1	After Starting	1	54	1	24.4	1
1353	0	Before Starting	1	53	1	38.15	1
1354	4	After Starting	1	50	1	31.2	1
1355	0	After Starting	0	51	1	27.55	1
1356	0	After Starting	0	59	0	38.13	1
1357	0	After Starting	1	50	1	32.9	0
1358	0	Before Starting	1	52	1	31.51	1
1359	0	Before Starting	0	53	1	25.51	1
1360	0	After Starting	1	55	0	27.4	1
1361	0	Before Starting	1	64	1	32.91	1
1362	0	After Starting	1	54	1	29.27	1
1363	1	Before Starting	0	50	1	39.1	1
1364	0	Before Starting	0	57	1	29.51	1
1365	0	Before Starting	1	58	0	26.06	1
1366	0	After Starting	0	64	0	36.22	1
1367	0	After Starting	0	58	0	27.4	1
1368	3	After Starting	0	64	0	33.5	1
1369	0	After Starting	0	52	1	34	1
1370	2	After Starting	1	52	0	31.64	1
1371	3	After Starting	0	50	1	33.4	1
1372	1	After Starting	1	56	1	35	1
1373	0	Before Starting	1	58	1	38.17	1
1374	3	After Starting	0	56	1	37.8	1
1375	0	Before Starting	0	62	1	40.5	1
1376	1	After Starting	0	55	1	29.1	1
1377	0	After Starting	1	57	1	28.3	1
1378	0	Before Starting	1	61	0	29.97	1
1379	0	After Starting	0	51	1	46.31	1
1380	0	Before Starting	0	54	1	23.46	1
1381	1	After Starting	0	62	0	32.3	1
1382	2	Before Starting	1	65	1	27.25	1
1383	0	Before Starting	1	57	0	30.5	1
1384	0	After Starting	0	57	1	34.89	1
1385	0	Before Starting	0	63	1	19.4	1
1386	2	Before Starting	1	52	1	33.01	1
1387	0	After Starting	1	50	1	32.73	1
1388	0	After Starting	0	60	1	28	1
1389	2	Before Starting	1	64	1	30.59	1
1390	1	After Starting	1	75	1	24.9	1
1391	0	After Starting	1	61	1	26.1	1
1392	0	Before Starting	0	59	1	23.63	1
1393	2	After Starting	0	62	1	46.5	1
1394	0	After Starting	0	52	1	29	1
1395	5	After Starting	0	55	1	38.8	1
1396	1	Before Starting	0	64	0	28.14	1
1397	0	Before Starting	0	65	1	30.76	1
1398	3	After Starting	0	56	1	29.8	1
1399	1	After Starting	0	76	1	26.36	1
1400	0	After Starting	0	50	1	36.39	1
1401	0	Before Starting	1	59	1	26.79	1
1402	4	Before Starting	1	60	1	23.58	1
1403	0	After Starting	1	57	0	34.1	1
1404	0	After Starting	0	77	1	27.52	1
1405	0	After Starting	0	57	0	25.09	1
1406	0	Before Starting	1	61	0	28.4	1
1407	1	After Starting	0	62	1	30.43	1
1408	0	Before Starting	0	74	0	23.62	1
1409	2	After Starting	0	58	0	30.2	1
1410	0	Before Starting	0	63	1	27.93	1
1411	3	After Starting	1	52	0	30.7	1
1412	1	Before Starting	0	54	0	40.46	1
1413	0	Before Starting	1	60	1	31.52	1
1414	0	Before Starting	0	64	1	24.08	1
1415	1	After Starting	0	59	0	25.9	1
1416	1	After Starting	0	77	1	32.3	1
1417	0	After Starting	1	63	1	33	0
1418	4	After Starting	1	59	0	28.14	1
1419	0	Before Starting	1	57	1	34.68	1
1420	1	Before Starting	1	73	1	28.1	1
1421	0	Before Starting	1	74	1	25.6	1
1422	0	Before Starting	1	53	1	24.86	1
1423	3	After Starting	0	54	1	25.56	1
1424	0	After Starting	0	71	1	37.81	1
1425	1	After Starting	0	59	0	33	1
1426	0	After Starting	1	52	1	23.9	1
1427	0	After Starting	0	53	1	32.49	1
1428	1	Before Starting	1	80	0	23.71	1
1429	0	Before Starting	0	63	0	30.49	1
1430	2	After Starting	1	65	1	29.8	1
1431	1	After Starting	0	65	0	26.2	1
1432	0	After Starting	0	59	0	26.91	1
1433	0	Before Starting	1	57	1	33.46	1
1434	0	Before Starting	1	68	1	30.52	1
1435	6	After Starting	1	59	1	24.3	1
1436	0	Before Starting	1	61	1	30.4	1
1437	0	After Starting	0	59	0	24	1
1438	0	Before Starting	0	51	1	23.9	1
1439	0	After Starting	1	54	0	28.5	1
1440	0	After Starting	0	52	1	22.53	1
1441	0	Before Starting	0	54	1	35.1	1
1442	0	Before Starting	0	57	0	34.76	1
1443	0	Before Starting	0	56	1	27.58	1
1444	1	Before Starting	1	60	0	24.79	1
1445	0	After Starting	0	61	1	27.3	1
1446	1	Before Starting	0	52	1	33.88	1
1447	0	After Starting	1	66	1	29.68	1
1448	3	Before Starting	1	51	1	32.77	1
1449	1	Before Starting	0	56	1	39.06	1
1450	3	Before Starting	1	64	1	23.5	1
1451	0	After Starting	0	74	1	22.8	1
1452	3	After Starting	0	59	1	25.1	1
1453	0	After Starting	0	62	1	24.4	1
1454	1	Before Starting	0	51	0	33.5	1
1455	0	After Starting	0	63	0	35.55	1
1456	5	After Starting	1	55	1	28.3	1
1457	0	After Starting	1	61	0	27.1	1
1458	1	Before Starting	0	52	1	32.8	1
1459	0	Before Starting	0	52	1	32.8	1
1460	0	Before Starting	0	51	1	32.77	1
1461	1	After Starting	1	56	1	32.14	1
1462	1	Before Starting	0	67	1	35	1
1463	1	After Starting	0	56	1	38.74	1
1464	0	Before Starting	0	60	1	35.43	1
1465	0	Before Starting	1	62	1	23.21	1
1466	2	After Starting	1	72	1	28.1	1
1467	0	Before Starting	0	54	0	28.42	1
1468	1	Before Starting	0	59	0	29.5	1
1469	0	After Starting	0	63	1	32.77	1
1470	1	After Starting	1	68	1	27.19	1
1471	0	Before Starting	0	54	1	32.7	1
1472	0	Before Starting	0	55	1	30.75	1
1473	0	Before Starting	0	52	0	33.66	1
1474	1	Before Starting	0	58	1	25.22	1
1475	3	Before Starting	0	72	1	23.46	1
1476	0	Before Starting	0	56	1	25.67	1
1477	0	After Starting	0	63	1	25	1
1478	6	After Starting	1	66	1	21.8	1
1479	1	After Starting	1	62	1	21.75	1
1480	5	Before Starting	1	55	1	33.9	1
1481	6	After Starting	1	67	1	28.8	1
1482	2	After Starting	1	76	1	27.1	1
1483	1	After Starting	1	56	1	40.3	1
1484	0	Before Starting	1	52	1	30.59	1
1485	0	After Starting	1	74	1	31.18	1
1486	0	Before Starting	0	60	0	28	1
1487	0	Before Starting	0	59	1	19.1	1
1488	1	Before Starting	0	57	0	36.2	1
1489	0	Before Starting	0	68	1	49.17	1
1490	0	Before Starting	0	55	1	40.37	1
1491	0	Before Starting	0	56	1	30.23	1
1492	0	Before Starting	1	66	1	25.38	1
1493	2	Before Starting	0	60	1	37	1
1494	0	Before Starting	0	60	1	21.7	1
1495	0	After Starting	1	60	0	26.6	1
1496	4	Before Starting	0	54	1	36.1	1
1497	0	Before Starting	0	53	1	34.9	1
1498	0	Before Starting	0	50	0	30.68	1
1499	0	Before Starting	1	50	1	30.51	1
1500	2	Before Starting	1	54	0	29.52	1
1501	1	Before Starting	1	56	1	27.87	1
1502	0	After Starting	1	52	1	33.75	1
1503	0	Before Starting	1	69	1	26.24	1
1504	1	Before Starting	1	65	1	38.13	1
1505	1	Before Starting	0	54	1	38.03	1
1506	0	Before Starting	0	72	1	27.91	1
1507	0	After Starting	0	51	1	32.5	1
1508	0	Before Starting	0	60	1	21.55	1
1509	1	After Starting	0	52	1	31.9	1
1510	1	Before Starting	0	57	1	36.17	1
1511	0	Before Starting	1	54	1	27.14	1
1512	2	Before Starting	1	65	0	30.63	1
1513	0	Before Starting	1	62	1	34.24	1
1514	1	After Starting	0	50	0	27.55	1
1515	0	Before Starting	1	51	1	26.76	1
1516	1	Before Starting	0	58	0	38.34	1
1517	0	After Starting	0	54	1	29.3	0
1518	0	After Starting	0	56	1	25.89	1
1519	0	After Starting	1	58	1	24.82	1
1520	0	Before Starting	1	61	1	22.7	1
1521	1	After Starting	0	60	0	27	1
1522	0	Before Starting	1	65	1	19.19	1
1523	0	Before Starting	0	50	1	25.12	1
1524	0	After Starting	1	50	0	19.36	1
1525	2	Before Starting	0	66	1	27.06	1
1526	2	After Starting	0	66	1	25.08	1
1527	1	Before Starting	1	51	1	31.65	1
1528	1	After Starting	0	60	0	26.08	1
1529	0	Before Starting	0	50	0	34.56	1
1530	3	After Starting	0	72	1	25.37	1
1531	0	After Starting	0	60	0	32.71	1
1532	0	After Starting	0	57	1	28.1	1
1533	0	Before Starting	0	51	1	30.76	1
1534	0	Before Starting	1	64	1	31.27	1
1535	0	Before Starting	1	56	1	29.71	1
1536	0	After Starting	0	63	1	29.86	1
1537	4	After Starting	1	62	1	34.1	1
1538	1	Before Starting	1	65	0	22.37	1
1539	0	Before Starting	1	64	0	33.98	1
1540	0	Before Starting	1	59	1	30.08	1
1541	0	After Starting	0	53	1	33.28	1
1542	0	Before Starting	1	67	0	31.35	1
1543	1	Before Starting	1	53	0	31.86	1
1544	2	After Starting	0	60	1	20.67	1
1545	0	After Starting	1	51	1	33	1
1546	0	Before Starting	0	58	1	30.08	1
1547	1	After Starting	1	61	1	28.5	1
1548	0	Before Starting	1	55	0	28.2	1
1549	0	Before Starting	0	56	1	28.13	1
1550	3	After Starting	1	59	1	28.38	1
1551	0	Before Starting	1	51	1	31.64	1
1552	0	After Starting	0	51	1	32.2	1
1553	0	Before Starting	0	57	1	26.81	1
1554	0	After Starting	1	53	0	28.69	1
1555	0	After Starting	1	52	0	27.8	1
1556	0	Before Starting	0	54	1	30.3	1
1557	0	Before Starting	1	54	1	34.7	1
1558	0	After Starting	0	53	1	27	1
1559	1	Before Starting	0	65	1	26.57	1
1560	0	After Starting	0	51	1	26.49	1
1561	0	After Starting	1	67	1	32.9	1
1562	1	Before Starting	0	60	1	26.66	1
1563	3	Before Starting	1	58	0	24.84	1
1564	0	Before Starting	0	51	1	22.98	1
1565	0	After Starting	1	58	1	24.2	1
1566	1	Before Starting	0	60	1	44.91	1
1567	1	After Starting	0	65	0	31.63	1
1568	0	Before Starting	0	59	1	28.27	1
1569	5	Before Starting	1	63	1	33.53	1
1570	1	Before Starting	0	67	1	21.16	1
1571	0	After Starting	0	56	1	29.2	1
1572	0	Before Starting	0	60	1	31.29	1
1573	0	Before Starting	0	52	0	29.75	1
1574	0	After Starting	0	61	1	35.5	1
1575	0	Before Starting	1	51	1	24.63	1
1576	0	Before Starting	1	60	0	25.06	1
1577	0	Before Starting	0	67	1	27.89	1
1578	0	Before Starting	1	52	1	31.61	1
1579	0	Before Starting	0	82	1	27.59	1
1580	0	After Starting	0	61	1	35.55	1
1581	2	Before Starting	0	57	1	33.33	1
1582	1	Before Starting	1	66	1	28.24	1
1583	0	Before Starting	0	55	1	27.85	1
1584	2	Before Starting	0	65	1	29.68	1
1585	0	Before Starting	0	56	1	37.15	1
1586	0	After Starting	0	54	1	34.44	1
1587	0	Before Starting	0	50	1	27.07	1
1588	2	Before Starting	0	57	1	33.47	1
1589	1	Before Starting	0	60	0	20.43	1
1590	0	After Starting	1	56	0	32.92	1
1591	0	Before Starting	1	56	0	22.39	1
1592	5	After Starting	1	62	1	30.3	1
1593	0	Before Starting	1	56	1	25.31	1
1594	1	Before Starting	1	63	1	38.74	1
1595	2	Before Starting	1	55	0	40.02	1
1596	4	Before Starting	1	52	1	32.43	1
1597	2	After Starting	1	76	1	29.69	1
1598	0	Before Starting	0	51	0	27.03	1
1599	2	Before Starting	1	51	1	35.62	1
1600	0	Before Starting	1	57	0	26.11	1
1601	0	Before Starting	0	50	1	27.93	1
1602	2	Before Starting	1	59	1	26.3	1
1603	1	Before Starting	0	50	1	34.67	1
1604	0	Before Starting	0	59	1	27.6	1
1605	4	Before Starting	1	77	1	34.88	1
1606	0	After Starting	0	50	1	23.9	1
1607	1	Before Starting	0	64	0	30.47	1
1608	0	After Starting	0	64	1	28.2	1
1609	0	Before Starting	0	64	1	24	1
1610	0	Before Starting	0	59	1	29.49	1
1611	0	After Starting	1	57	1	30.4	1
1612	1	Before Starting	1	55	1	34.49	1
1613	2	Before Starting	1	62	1	26.36	1
1614	0	After Starting	1	51	0	39.4	1
1615	0	Before Starting	1	53	1	24.7	1
1616	5	After Starting	0	70	1	40.5	1
1617	2	Before Starting	1	69	1	21.4	1
1618	0	Before Starting	1	56	0	28.37	1
1619	1	After Starting	0	63	1	36.6	1
1620	3	After Starting	1	53	1	32.6	1
1621	0	After Starting	1	55	1	28.77	1
1622	0	Before Starting	1	64	1	28.01	1
1623	3	Before Starting	0	53	1	23.71	0
1624	3	After Starting	0	64	0	26.5	1
1625	0	Before Starting	0	59	0	35.34	1
1626	0	Before Starting	1	53	0	31.47	1
1627	0	Before Starting	1	50	0	28.94	1
1628	0	Before Starting	0	51	1	28.89	1
1629	0	Before Starting	0	57	1	29.33	1
1630	0	After Starting	1	52	0	25	1
1631	0	Before Starting	0	52	0	24.4	1
1632	3	Before Starting	0	60	1	23.56	1
1633	0	After Starting	0	66	0	23.8	1
1634	1	Before Starting	0	62	1	33.15	1
1635	0	After Starting	0	53	1	58.8	1
1636	1	After Starting	0	51	1	34.4	1
1637	0	Before Starting	1	66	1	27.28	1
1638	1	After Starting	0	50	0	24.5	1
1639	0	Before Starting	1	71	1	37.52	1
1640	0	After Starting	0	55	1	36.92	1
1641	0	Before Starting	0	58	0	24.58	1
1642	0	Before Starting	1	52	0	26.2	1
1643	2	Before Starting	0	55	0	24.54	1
1644	0	Before Starting	0	58	0	33.19	1
1645	0	After Starting	0	53	1	26.4	1
1646	6	Before Starting	1	53	1	32.08	1
1647	0	After Starting	0	64	1	30.5	1
1648	0	Before Starting	0	67	0	33.5	1
1649	0	After Starting	0	63	1	32.8	1
1650	0	Before Starting	0	72	1	29.5	1
1651	0	Before Starting	0	53	1	28.48	1
1652	6	Before Starting	0	60	0	30.82	1
1653	0	Before Starting	1	50	0	29.31	1
1654	1	After Starting	1	51	1	26	1
1655	0	Before Starting	0	73	0	22.85	1
1656	0	Before Starting	0	60	0	32.9	1
1657	0	Before Starting	1	56	0	30.25	1
1658	1	Before Starting	1	51	0	30.15	1
1659	3	Before Starting	1	54	1	32.49	1
1660	3	Before Starting	1	63	1	32.3	1
1661	0	After Starting	0	56	1	28.93	1
1662	0	After Starting	1	58	1	28.11	1
1663	0	Before Starting	1	63	0	39.1	1
1664	0	Before Starting	0	64	1	36.43	1
1665	0	Before Starting	1	58	1	30.9	1
1666	5	After Starting	0	65	1	26.66	1
1667	1	Before Starting	0	50	0	30.98	1
1668	0	Before Starting	0	60	0	33.13	1
1669	2	After Starting	1	64	1	29.42	1
1670	0	After Starting	0	78	1	40.4	1
1671	0	Before Starting	1	52	0	30.6	1
1672	1	Before Starting	0	61	0	35.07	1
1673	1	Before Starting	1	55	0	31.41	1
1674	0	After Starting	0	53	1	25.3	1
1675	3	After Starting	1	50	1	28.7	1
1676	0	Before Starting	1	60	0	36.48	1
1677	2	After Starting	0	58	1	32.35	1
1678	1	Before Starting	1	57	0	23.1	1
1679	1	Before Starting	1	80	1	32.48	1
1680	0	After Starting	0	57	1	26.8	1
1681	1	Before Starting	0	50	1	41.95	1
1682	4	Before Starting	1	66	0	33.22	1
1683	1	Before Starting	1	52	0	28.4	1
1684	4	Before Starting	1	69	0	24.91	1
1685	0	Before Starting	1	60	1	27.7	1
1686	1	Before Starting	1	56	1	32.76	1
1687	0	Before Starting	1	74	0	23.59	1
1688	0	After Starting	0	50	1	37.4	0
1689	0	Before Starting	1	61	1	32.36	1
1690	3	After Starting	1	52	0	32.6	1
1691	0	After Starting	1	50	1	30.27	1
1692	0	After Starting	0	56	1	38.04	1
1693	1	Before Starting	1	59	1	33.48	1
1694	0	After Starting	0	56	1	26.6	1
1695	0	After Starting	0	55	1	22.13	1
1696	2	After Starting	0	73	1	33.1	1
1697	1	After Starting	1	60	0	25	1
1698	1	Before Starting	0	63	1	34.6	1
1699	3	After Starting	0	60	0	42.71	1
1700	0	After Starting	0	58	1	26.85	1
1701	3	After Starting	0	54	1	25.25	1
1702	1	After Starting	1	55	1	25.91	1
1703	0	Before Starting	0	75	0	29.3	1
1704	1	Before Starting	0	72	1	20.1	1
1705	0	Before Starting	0	52	0	28.22	1
1706	0	Before Starting	1	50	0	29.48	1
1707	0	Before Starting	0	63	1	28.08	1
1708	0	After Starting	1	81	1	26.57	1
1709	1	Before Starting	0	72	0	23.9	1
1710	0	After Starting	0	62	0	33.75	1
1711	1	After Starting	1	62	1	25.69	1
1712	0	Before Starting	1	62	1	26.7	1
1713	0	Before Starting	0	63	0	22.95	1
1714	2	Before Starting	0	61	1	47.78	1
1715	1	Before Starting	0	61	0	28.48	1
1716	0	Before Starting	1	74	1	20.2	1
1717	0	After Starting	1	58	1	25.82	1
1718	2	After Starting	1	50	1	34.1	1
1719	2	After Starting	1	63	1	42.5	1
1720	0	After Starting	1	59	1	32.17	1
1721	0	After Starting	0	63	0	34.92	1
1722	0	Before Starting	0	50	1	33.28	1
1723	3	After Starting	1	66	1	28.3	1
1724	0	Before Starting	0	56	0	28.36	1
1725	0	Before Starting	1	60	0	33.44	1
1726	1	After Starting	0	52	1	22.55	1
1727	0	Before Starting	1	52	1	40	1
1728	0	After Starting	0	63	0	33.51	1
1729	0	Before Starting	0	72	0	26.16	1
1730	0	Before Starting	1	65	1	28	1
1731	0	After Starting	0	56	0	22.59	1
1732	2	After Starting	1	59	1	28.4	1
1733	1	Before Starting	1	69	0	27.57	1
1734	0	After Starting	1	64	1	23.5	1
1735	1	After Starting	0	61	1	34.4	1
1736	0	Before Starting	1	74	1	24.5	1
1737	0	After Starting	1	51	1	31.6	1
1738	0	After Starting	1	53	0	29.6	1
1739	0	After Starting	1	50	1	37.72	1
1740	0	Before Starting	0	60	1	29.02	1
1741	0	After Starting	1	63	1	30.75	1
1742	0	Before Starting	0	77	0	27.34	1
1743	0	Before Starting	0	63	1	29.14	1
1744	5	After Starting	1	53	1	26.6	1
1745	0	After Starting	1	52	1	33.3	1
1746	3	After Starting	0	66	1	26.78	1
1747	0	Before Starting	0	61	0	27	1
1748	0	After Starting	1	59	0	26	1
1749	0	After Starting	1	54	1	41.6	1
1750	0	Before Starting	0	62	0	52.17	1
1751	0	After Starting	0	55	0	23.38	1
1752	0	After Starting	0	53	1	34.5	1
1753	6	After Starting	1	55	1	35	1
1754	2	Before Starting	0	67	1	34.34	1
1755	0	Before Starting	0	63	1	32.11	1
1756	1	Before Starting	1	59	1	30.48	1
1757	1	After Starting	0	64	0	29.7	1
1758	5	After Starting	1	55	1	21.9	1
1759	2	After Starting	1	75	0	28.01	1
1760	1	After Starting	0	58	1	22	1
1761	1	After Starting	1	64	1	27.68	1
1762	0	After Starting	1	50	0	24.46	1
1763	0	After Starting	1	52	0	26.03	1
1764	2	After Starting	0	61	0	25.16	1
1765	0	After Starting	0	53	1	22.3	1
1766	0	After Starting	1	51	1	30	1
1767	0	After Starting	0	66	0	38.32	1
1768	0	After Starting	0	64	1	28.84	1
1769	1	After Starting	0	51	1	40.12	1
1770	2	After Starting	0	72	0	30.93	1
1771	0	After Starting	0	52	0	25.47	1
1772	1	After Starting	0	55	1	32.27	1
1773	0	After Starting	1	64	1	36.9	1
1774	1	After Starting	1	69	0	27.34	1
1775	0	After Starting	0	68	1	33	1
1776	0	After Starting	0	79	0	33.92	1
1777	1	After Starting	0	62	0	20.64	1
1778	2	After Starting	1	73	1	31	1
1779	0	After Starting	1	60	1	32.4	1
1780	0	After Starting	0	53	0	29.7	1
1781	0	After Starting	0	68	0	30	1
1782	2	After Starting	1	68	1	23.74	1
1783	6	After Starting	1	60	1	27.83	1
1784	1	After Starting	0	59	1	42.2	1
1785	0	After Starting	1	56	1	26.89	1
1786	1	After Starting	0	51	1	23.17	1
1787	0	After Starting	0	51	1	24.44	1
1788	0	After Starting	1	57	1	26.87	1
1789	1	After Starting	0	57	1	31.68	1
1790	0	After Starting	0	51	1	25.7	1
1791	0	After Starting	0	56	0	28.58	1
1792	1	After Starting	0	55	0	32.82	1
1793	1	After Starting	1	57	1	24.7	1
1794	0	After Starting	1	61	0	26.9	1
1795	2	After Starting	1	60	1	31.25	1
1796	2	After Starting	1	56	1	28	1
1797	0	After Starting	0	53	0	33.4	1
1798	5	After Starting	0	61	1	32.59	1
1799	0	After Starting	1	79	1	20.47	1
1800	1	After Starting	0	55	1	22.43	1
1801	0	After Starting	0	53	1	30.8	1
1802	0	After Starting	0	63	0	27.39	1
1803	2	After Starting	1	61	1	29.9	1
1804	3	After Starting	0	63	0	28.32	1
1805	1	After Starting	1	51	1	29.6	1
1806	0	After Starting	1	61	1	31.2	1
1807	0	After Starting	1	71	0	28.5	1
1808	6	After Starting	1	59	0	38.58	0
1809	0	After Starting	1	57	1	36.42	1
1810	0	After Starting	0	82	1	23.29	1
1811	0	After Starting	1	51	0	28.91	1
1812	0	After Starting	0	56	0	38.42	1
1813	0	After Starting	0	50	1	28.92	1
1814	3	After Starting	1	53	0	44.35	1
1815	2	After Starting	1	57	0	25.13	0
1816	1	After Starting	1	56	1	25.1	1
1817	0	After Starting	0	63	0	31.17	1
1818	1	After Starting	0	52	1	33.3	1
1819	0	After Starting	0	52	0	34.28	1
1820	2	After Starting	0	61	1	28.01	1
1821	0	After Starting	0	55	0	28.05	1
1822	0	After Starting	0	57	0	26.21	1
1823	0	After Starting	0	62	1	28.5	1
1824	0	After Starting	1	77	1	17.62	1
1825	2	After Starting	1	52	1	28.7	1
1826	0	After Starting	0	52	0	23.36	1
1827	2	After Starting	1	55	1	28.67	1
1828	2	After Starting	0	78	1	28.29	1
1829	1	After Starting	0	56	1	41.34	1
1830	3	After Starting	1	61	1	36.22	1
1831	2	After Starting	0	63	1	25.4	1
1832	1	After Starting	1	52	1	29	1
1833	1	After Starting	1	61	0	25.68	1
1834	2	After Starting	0	52	0	32.68	1
1835	0	After Starting	1	63	0	19.6	1
1836	0	After Starting	1	59	1	38.2	1
1837	1	After Starting	0	55	0	32.09	1
1838	2	After Starting	0	55	0	26.9	1
1839	0	After Starting	1	53	1	32.3	1
1840	0	After Starting	0	53	1	24.23	1
1841	1	After Starting	1	64	1	23.91	1
1842	0	After Starting	0	52	1	25	1
1843	0	After Starting	1	63	1	27.5	1
1844	0	After Starting	0	57	1	27.11	1
1845	0	After Starting	1	50	0	24.26	1
1846	0	After Starting	0	70	1	26.8	1
1847	2	After Starting	1	55	1	25.86	1
1848	1	After Starting	1	56	1	29.58	1
1849	1	After Starting	1	54	1	26.3	1
1850	3	After Starting	1	59	1	30.1	1
1851	1	After Starting	1	57	1	29.1	1
1852	1	After Starting	1	57	0	27.8	1
1853	1	After Starting	1	66	0	30.9	1
1854	1	After Starting	1	64	1	35.33	1
1855	0	After Starting	0	54	1	30.4	1
1856	1	After Starting	0	55	1	29.6	1
1857	0	After Starting	0	54	1	27	1
1858	5	After Starting	0	59	1	35.3	1
1859	1	After Starting	1	60	1	28.55	1
1860	0	After Starting	1	57	0	28.45	1
1861	0	After Starting	0	57	1	34.2	1
1862	2	After Starting	0	62	1	47.5	1
1863	2	After Starting	1	62	0	32.1	1
1864	1	After Starting	0	52	1	22.8	1
1865	4	After Starting	1	50	1	41.3	1
1866	1	After Starting	1	53	0	33.94	1
1867	1	After Starting	1	51	1	26	1
1868	3	After Starting	1	59	1	26	0
1869	0	After Starting	1	54	1	26.3	1
1870	1	After Starting	1	75	1	28.2	1
1871	3	After Starting	1	64	1	25.1	1
1872	3	After Starting	1	65	1	34.9	1
1873	0	After Starting	1	51	0	22.2	1
1874	4	After Starting	1	51	0	23.8	1
1875	3	After Starting	1	66	1	28.1	1
1876	1	After Starting	0	52	1	32	1
1877	0	After Starting	1	60	0	34.5	1
1878	0	After Starting	0	68	1	30.3	1
1879	0	After Starting	1	65	1	34.4	1
1880	1	After Starting	0	52	1	29.3	1
1881	1	After Starting	1	50	1	24.4	1
1882	0	After Starting	0	56	0	25.3	1
1883	0	After Starting	0	61	1	30.4	1
1884	1	After Starting	0	55	1	35.1	1
1885	0	After Starting	1	75	0	36.4	1
1886	1	After Starting	1	53	1	32.4	1
1887	4	After Starting	1	60	1	29.4	1
1888	0	After Starting	0	53	1	31.9	1
1889	0	After Starting	1	59	0	25.2	1
1890	2	After Starting	1	55	1	32.8	1
1891	1	After Starting	1	61	1	33.1	1
1892	0	After Starting	0	68	0	25.3	1
1893	2	After Starting	1	63	1	27.5	1
1894	0	After Starting	1	67	1	26	1
1895	0	After Starting	0	58	0	38	1
1896	0	After Starting	0	64	1	26	1
1897	1	After Starting	1	59	1	36	1
1898	1	After Starting	0	65	1	25.1	1
1899	0	After Starting	0	52	1	26.2	1
1900	0	After Starting	0	75	1	36	1
1901	1	After Starting	0	73	0	31.1	1
1902	0	After Starting	0	70	0	25.2	1
1903	1	After Starting	1	55	0	31	1
1904	0	After Starting	0	50	1	25.9	1
1905	2	After Starting	0	61	1	30.7	1
1906	0	After Starting	0	60	1	26.4	1
1907	3	After Starting	0	53	1	43.4	1
1908	0	After Starting	0	59	0	29.1	1
1909	0	After Starting	0	55	1	23	1
1910	0	After Starting	0	62	1	23.8	1
1911	1	After Starting	1	50	0	25.9	1
1912	0	After Starting	1	52	1	23.5	1
1913	3	After Starting	0	51	0	40	1
1914	2	After Starting	1	72	1	27.4	1
1915	0	After Starting	1	56	1	38.3	1
1916	0	After Starting	0	61	1	32.1	1
1917	2	After Starting	1	50	0	30.1	1
1918	2	After Starting	0	62	0	33.6	1
1919	3	After Starting	1	60	0	25.8	1
1920	0	After Starting	1	58	0	28.3	1
1921	4	After Starting	1	58	0	33.4	1
1922	1	After Starting	0	65	1	30.3	1
1923	4	After Starting	0	69	1	28	1
1924	6	After Starting	0	58	0	33.1	1
1925	2	After Starting	1	69	1	30.1	1
1926	0	After Starting	1	57	1	33.2	1
1927	0	After Starting	0	50	1	30.1	1
1928	1	After Starting	1	52	1	34.9	1
1929	0	After Starting	0	53	1	32.8	1
1930	1	After Starting	1	50	0	36.3	1
1931	6	After Starting	1	53	1	32.3	1
1932	2	Before Starting	1	57	1	35.09	1
1933	1	After Starting	1	51	1	32.4	1
1934	0	Before Starting	0	65	1	34.01	1
1935	0	Before Starting	0	59	0	25	1
1936	0	After Starting	1	66	1	21.99	1
